# Supplementary material for: Rapid soil organic carbon decomposition in river systems: effects of the aquatic microbial community and hydrodynamical disturbance
Source: Copernicus journal article supplement (doi:10.5194/bg-18-1511-2021), 2021-03-03
Supplement: Supplementary file 1 [file bg-18-1511-2021-supplement.zip]

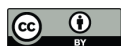

## *Supplement of*

# **Rapid soil organic carbon decomposition in river systems: effects of the aquatic microbial community and hydrodynamical disturbance**

**Man Zhao et al.**

*Correspondence to:* Man Zhao ([man.zhao@kuleuven.be](mailto:man.zhao@kuleuven.be))

- [bg-18-1511-2021-supplement-title-page.pdf](#)
- [Zhao et al\\_Supplementary materials.xlsx](#)

The copyright of individual parts of the supplement might differ from the CC BY 4.0 License.
