# Supplementary material for: Rapid soil organic carbon decomposition in river systems: effects of the aquatic microbial community and hydrodynamical disturbance
Source: Copernicus journal article supplement (doi:10.5194/bg-18-1511-2021), 2021-03-03
Supplement: Supplementary file 1 [file Zhao et al_Supplementary materials.xlsx]

## Sheet: Overview
Supplementary material
Rapid soil organic carbon decomposition rates in river systems: effects of priming and hydrodynamical disturbance
Man Zhao 1, Liesbet Jacobs 1, Steven Bouillon 1, Gerard Govers 1
1 KU Leuven, Department of Earth and Environmental Sciences, 3001 Leuven, Belgium
Sheet name	Explanation
1. DO consumption_arable soil	Figure 3(a): DO consumption during the 168 h' incubation with arable land soil
2. DO consumption_forest soil	Figure 3(b): DO consumption during the 168 h' incubation with forest soil
3. Total amount of C mineralized	Figure 4: Total amount of C mineralized during the 168h’ incubations with and without AMO under rotation rotating and standing stationary conditions with (a) soil from arable land (b) forest soils.
4. air dried vs. oven dried soil	Figure 5: Cumulative amount of C mineralized during incubation with soil under two drying methods: a) oven dried soil; b) and air dried soil, with addition of AMO and without AMO.
5. POC concentrations and δ13CPOC	Figure 6: Evolution of POC concentrations and δ13CPOC values during the incubations
6. DOC concentrations and δ13CDOC	Figure 7: Evolution of DOC concentrations and δ13CDOC values during the incubations

## Sheet: 1.DO consumption_arable soil
a) DO concentrations during the 168h' incubation (mg L-1)														b) DO consumption during the 168h' incubation (Figure 3 a): DOt -Doinital (mg L-1)
Time (h)	SOC+AMO_rotation	SE_1	SOC+AMO_stationary	SE_2	DOC control_ rotation	SE_3	DOC control_ stationary	SE_4	SOC-AMO_ rotation	SE_5	SOC-AMO_ stationary	SE_6		Time (h)	SOC+AMO_rotation	SE_1	SOC+AMO_stationary	SE_2	DOC control_ rotation	SE_3	DOC control_ stationary	SE_4	SOC-AMO_ rotation	SE_5	SOC-AMO_ stationary	SE_6
1	8.90586	0.122616	8.87764	0.135604	8.9262	0.108945	8.85955	0.0675441	9.45909	0.331043	9.61503	0.289369		1	0	0	0	0	0	0	0	0	0	0	0	0
2	8.88205	0.12546	8.87636	0.130124	8.91942	0.104913	8.86174	0.0667137	9.42733	0.321812	9.58335	0.287905		2	-0.0238159	0.0114428	-0.00128866	0.0138195	-0.00678626	0.0203045	0.00218854	0.0183144	-0.0317572	0.0137432	-0.0316739	0.0160851
3	8.85292	0.130658	8.85532	0.123745	8.90691	0.110078	8.84835	0.072792	9.39917	0.316678	9.55098	0.287425		3	-0.0529452	0.0162912	-0.0223276	0.0242021	-0.019292	0.0317397	-0.0112078	0.0297842	-0.0599237	0.0265616	-0.0640455	0.027531
4	8.83066	0.13269	8.83485	0.12085	8.90002	0.113159	8.83573	0.0768769	9.38256	0.315219	9.53149	0.288713		4	-0.0752028	0.018925	-0.0427942	0.0283594	-0.0261823	0.0389269	-0.0238217	0.0359662	-0.0765294	0.0310895	-0.0835372	0.033173
5	8.81413	0.134677	8.80531	0.121707	8.89253	0.116219	8.81583	0.0866381	9.37048	0.315038	9.51341	0.289821		5	-0.091728	0.0203961	-0.0723344	0.0317623	-0.0336738	0.0437484	-0.0437207	0.0407437	-0.0886079	0.0314555	-0.101619	0.0340057
6	8.80133	0.135236	8.79461	0.123002	8.8898	0.118297	8.80403	0.09072	9.36104	0.314906	9.49859	0.291299		6	-0.10453	0.0214057	-0.0830359	0.0305325	-0.0363998	0.0471722	-0.0555276	0.0463063	-0.0980538	0.03181	-0.116438	0.0348911
7	8.78583	0.135843	8.77283	0.119804	8.88437	0.120773	8.79277	0.0972955	9.35555	0.314963	9.4849	0.291669		7	-0.120032	0.0230536	-0.104814	0.0350184	-0.0418338	0.0512904	-0.066787	0.0510592	-0.10354	0.0319279	-0.130124	0.0356962
8	8.78249	0.135031	8.76004	0.120245	8.88202	0.122123	8.78696	0.101134	9.35083	0.314702	9.47104	0.291651		8	-0.123374	0.0208753	-0.117602	0.0372514	-0.0441835	0.0529731	-0.072599	0.0545151	-0.108264	0.0327177	-0.143986	0.0388538
9	8.77426	0.135169	8.73681	0.114507	8.87787	0.123883	8.77829	0.103226	9.34605	0.314376	9.46504	0.292243		9	-0.131597	0.0209988	-0.140834	0.0436634	-0.0483273	0.054021	-0.0812609	0.0563038	-0.113041	0.0331307	-0.14999	0.0397773
10	8.75012	0.13752	8.71477	0.110232	8.87797	0.125238	8.77123	0.105492	9.34248	0.314838	9.46841	0.296842		10	-0.155746	0.0245019	-0.162877	0.051023	-0.0482314	0.0554223	-0.0883257	0.0583547	-0.116613	0.0328335	-0.146615	0.0400007
11	8.72847	0.140313	8.70141	0.10926	8.87886	0.126524	8.76563	0.107396	9.3412	0.316159	9.46632	0.298		11	-0.177394	0.0305007	-0.17623	0.053929	-0.0473456	0.0568224	-0.0939265	0.0602473	-0.117885	0.032187	-0.148705	0.0388549
12	8.71025	0.141117	8.68344	0.107137	8.87651	0.127114	8.75878	0.109364	9.33733	0.316579	9.46188	0.297918		12	-0.195613	0.0340498	-0.194208	0.0602269	-0.0496883	0.0574333	-0.10077	0.0617961	-0.121764	0.0318088	-0.153145	0.0379391
13	8.6883	0.138149	8.66578	0.106288	8.87005	0.127359	8.75274	0.111	9.33169	0.316926	9.45693	0.297576		13	-0.217558	0.0354598	-0.211869	0.0653169	-0.0561506	0.0583316	-0.106818	0.0633147	-0.127401	0.0311941	-0.158098	0.0380785
14	8.66987	0.136013	8.65552	0.10712	8.87021	0.128147	8.74828	0.112651	9.32496	0.318546	9.4497	0.29773		14	-0.235992	0.0376142	-0.22212	0.0658141	-0.0559881	0.059135	-0.111273	0.0649185	-0.134133	0.0298978	-0.165325	0.0385372
15	8.65547	0.136181	8.65025	0.108069	8.87338	0.128686	8.74536	0.11086	9.32138	0.320782	9.44741	0.300425		15	-0.250391	0.0410509	-0.227391	0.0647165	-0.052822	0.0588053	-0.114197	0.0642237	-0.137711	0.0302696	-0.167613	0.0393393
16	8.64079	0.1363	8.63951	0.108056	8.87107	0.129943	8.74086	0.112181	9.32021	0.321404	9.44415	0.301015		16	-0.265071	0.0441498	-0.238134	0.0667775	-0.0551287	0.0591464	-0.118691	0.0653447	-0.138882	0.0324611	-0.170874	0.038907
17	8.62665	0.138143	8.62604	0.107882	8.86915	0.131396	8.73258	0.114773	9.31463	0.322199	9.43484	0.301117		17	-0.279216	0.0479548	-0.251601	0.0704155	-0.0570535	0.0607566	-0.126969	0.0686465	-0.144463	0.0339155	-0.180185	0.039481
18	8.62745	0.146548	8.61076	0.108176	8.86749	0.133202	8.72436	0.117188	9.30733	0.321743	9.42318	0.30213		18	-0.278409	0.0513747	-0.266884	0.0740685	-0.0587145	0.0628571	-0.135199	0.0715219	-0.15176	0.0353412	-0.191842	0.0411722
19	8.60882	0.140063	8.59543	0.108329	8.86218	0.133175	8.7177	0.119228	9.29684	0.322467	9.40827	0.30227		19	-0.297041	0.0495531	-0.282211	0.0777176	-0.0640256	0.0634878	-0.141852	0.0738357	-0.162252	0.0366639	-0.206755	0.0424829
20	8.58754	0.137645	8.57714	0.10792	8.85917	0.134347	8.71108	0.120978	9.28585	0.3225	9.39208	0.302508		20	-0.318325	0.0534756	-0.3005	0.083114	-0.0670354	0.0655898	-0.148469	0.0757526	-0.173237	0.0378536	-0.222949	0.0434354
21	8.57532	0.133751	8.56804	0.109674	8.8544	0.134364	8.70438	0.122876	9.27861	0.322873	9.37357	0.302335		21	-0.330544	0.0511063	-0.3096	0.0805525	-0.0718021	0.0665471	-0.155172	0.0774999	-0.180479	0.0400977	-0.241456	0.0443412
22	8.57829	0.126041	8.55809	0.110262	8.85135	0.134831	8.69733	0.124592	9.26335	0.325615	9.3592	0.30319		22	-0.327569	0.0401279	-0.319557	0.0794787	-0.0748549	0.0679365	-0.162224	0.0792141	-0.195742	0.0418222	-0.255828	0.045484
23	8.59602	0.123931	8.549	0.112131	8.84842	0.135834	8.68873	0.128697	9.30376	0.353923	9.48239	0.307235		23	-0.309838	0.0295367	-0.328648	0.077736	-0.0777787	0.0694902	-0.170821	0.0824311	-0.23848	0.0333346	-0.291348	0.0484485
24	8.59504	0.135682	8.53992	0.110044	8.85368	0.13854	8.68813	0.12756	9.28925	0.353774	9.46816	0.308691		24	-0.310818	0.0333255	-0.337725	0.0796355	-0.0725202	0.0737792	-0.171426	0.0828142	-0.252993	0.0330606	-0.305584	0.0499098
25	8.55156	0.146286	8.53525	0.105439	8.83462	0.148465	8.68381	0.126623	9.27355	0.353523	9.45298	0.308857		25	-0.354303	0.0568035	-0.342393	0.0796506	-0.0915802	0.0770027	-0.175742	0.0831961	-0.268692	0.0314225	-0.320757	0.0505082
26	8.50961	0.151307	8.49181	0.101287	8.81734	0.154979	8.70719	0.119948	9.25957	0.353687	9.44009	0.30926		26	-0.396249	0.0635571	-0.385834	0.0852764	-0.108858	0.0825555	-0.152368	0.0654151	-0.282677	0.0308506	-0.333647	0.0511555
27	8.50341	0.145811	8.48271	0.102125	8.80677	0.156498	8.70385	0.121939	9.24436	0.35362	9.42462	0.309396		27	-0.402456	0.0555845	-0.394935	0.0837488	-0.119427	0.0856402	-0.155708	0.0668601	-0.297887	0.0308226	-0.349119	0.0523854
28	8.4775	0.152182	8.46652	0.101454	8.80086	0.159638	8.6988	0.122502	9.23072	0.354372	9.40963	0.310185		28	-0.428363	0.0603979	-0.411123	0.0890633	-0.12534	0.0867035	-0.160754	0.0669	-0.311523	0.0295221	-0.364109	0.0536214
29	8.45322	0.159094	8.46585	0.104026	8.79651	0.16142	8.69204	0.125119	9.21786	0.355199	9.39668	0.311295		29	-0.452646	0.0701459	-0.411791	0.0814229	-0.129694	0.0877091	-0.167516	0.0693372	-0.324388	0.0288685	-0.377059	0.0545433
30	8.43117	0.161621	8.4514	0.104804	8.79282	0.163568	8.68608	0.128977	9.20739	0.355506	9.38674	0.312352		30	-0.474691	0.0763026	-0.426242	0.080611	-0.133381	0.0897549	-0.173477	0.0732604	-0.334852	0.0299859	-0.387004	0.0562564
31	8.41568	0.168507	8.43227	0.105902	8.77641	0.165015	8.66745	0.137386	9.20032	0.35448	9.37723	0.313421		31	-0.490178	0.0832259	-0.445379	0.082982	-0.149791	0.0916994	-0.192102	0.0809649	-0.34192	0.0303166	-0.396507	0.0571276
32	8.39782	0.172325	8.41249	0.106664	8.77583	0.168577	8.65315	0.142088	9.18933	0.353232	9.36524	0.314496		32	-0.508047	0.0884653	-0.465152	0.086644	-0.150372	0.0965509	-0.206408	0.0853781	-0.352916	0.0305408	-0.4085	0.0586993
33	8.38053	0.173977	8.39544	0.108282	8.76949	0.170206	8.64546	0.14439	9.17984	0.352854	9.35485	0.315657		33	-0.525332	0.091925	-0.482204	0.0885441	-0.156716	0.0988213	-0.214095	0.0878227	-0.362399	0.0309988	-0.418888	0.0605432
34	8.36285	0.17659	8.38371	0.109381	8.76478	0.171454	8.64019	0.145871	9.17385	0.355287	9.35133	0.320241		34	-0.543017	0.096486	-0.493938	0.0902345	-0.161424	0.100526	-0.219362	0.0892734	-0.368394	0.0314161	-0.422414	0.0629565
35	8.34702	0.178976	8.37354	0.109532	8.76024	0.172021	8.63829	0.144549	9.16897	0.357319	9.34442	0.321763		35	-0.558841	0.100442	-0.504109	0.0922207	-0.165964	0.101489	-0.221266	0.0886781	-0.373274	0.0317587	-0.429319	0.064164
36	8.33228	0.180893	8.35889	0.109453	8.75468	0.172888	8.63275	0.145878	9.16049	0.357597	9.33795	0.322762		36	-0.573583	0.103788	-0.518758	0.0949359	-0.171523	0.103183	-0.226801	0.0899587	-0.381758	0.0318249	-0.435795	0.0654803
37	8.31551	0.183676	8.34418	0.109516	8.7507	0.173866	8.62887	0.145185	9.1495	0.357804	9.33086	0.32367		37	-0.590355	0.107562	-0.533467	0.0983423	-0.175499	0.104544	-0.230682	0.089385	-0.392745	0.0315131	-0.442885	0.0666151
38	8.30466	0.186647	8.33163	0.110321	8.74835	0.174819	8.6253	0.145385	9.13873	0.360045	9.32299	0.325462		38	-0.601202	0.110824	-0.546017	0.101659	-0.177855	0.106512	-0.23425	0.0895215	-0.403515	0.0305466	-0.45075	0.0667881
39	8.2966	0.188494	8.32197	0.109842	8.74776	0.173816	8.62987	0.141858	9.12764	0.361995	9.31242	0.32685		39	-0.609258	0.113446	-0.555676	0.104412	-0.178438	0.106039	-0.229686	0.0862395	-0.414606	0.0302883	-0.461316	0.0674971
40	8.28664	0.190872	8.31225	0.110568	8.74328	0.174077	8.62629	0.142525	9.11754	0.363024	9.30418	0.326672		40	-0.619222	0.116066	-0.56539	0.106567	-0.182925	0.106133	-0.233264	0.0865745	-0.424699	0.0298024	-0.469558	0.0681533
41	8.27586	0.192194	8.29773	0.111232	8.73769	0.174909	8.62024	0.143201	9.10483	0.363033	9.29488	0.326926		41	-0.630007	0.117999	-0.579914	0.110536	-0.188512	0.107485	-0.239315	0.087378	-0.437411	0.0302432	-0.47886	0.0695525
42	8.26731	0.192836	8.2822	0.113057	8.73273	0.175716	8.61202	0.144174	9.09402	0.363344	9.28585	0.327448		42	-0.638557	0.118866	-0.595445	0.115789	-0.193468	0.109041	-0.247532	0.0882812	-0.448225	0.0306628	-0.48789	0.070684
43	8.25857	0.193413	8.26966	0.114513	8.72934	0.176693	8.60516	0.145418	9.03414	0.334204	9.15242	0.321668		43	-0.647293	0.120103	-0.60798	0.117953	-0.196867	0.11061	-0.254395	0.089504	-0.424948	0.0407981	-0.462602	0.0668087
44	8.24792	0.193952	8.25666	0.115983	8.72402	0.177253	8.6005	0.146843	9.02262	0.334338	9.14418	0.323729		44	-0.657944	0.121434	-0.62098	0.121052	-0.202181	0.111765	-0.259056	0.0911432	-0.436469	0.0405453	-0.470844	0.0669304
45	8.23591	0.194447	8.24332	0.117246	8.7183	0.177715	8.59399	0.148463	9.01619	0.334884	9.13776	0.324736		45	-0.669949	0.122591	-0.634327	0.122289	-0.207903	0.112826	-0.265561	0.0928307	-0.442895	0.0412665	-0.477266	0.0675319
46	8.22339	0.195611	8.22912	0.119041	8.71292	0.178494	8.58737	0.150373	9.00844	0.335301	9.13154	0.325567		46	-0.682468	0.124356	-0.648525	0.124139	-0.213278	0.114166	-0.272187	0.0946682	-0.450645	0.0417016	-0.483488	0.067912
47	8.21002	0.196698	8.21554	0.119876	8.70722	0.179622	8.58551	0.151956	8.99967	0.335121	9.1269	0.326647		47	-0.695839	0.125938	-0.6621	0.125808	-0.218979	0.115544	-0.274048	0.0966748	-0.459419	0.041954	-0.488128	0.0687076
48	8.19547	0.197688	8.20139	0.120897	8.70058	0.18022	8.57855	0.154293	8.99207	0.334976	9.1251	0.328873		48	-0.71039	0.127453	-0.676254	0.126977	-0.225621	0.116529	-0.281002	0.0989683	-0.467024	0.0422941	-0.489931	0.0706298
49	8.1839	0.20055	8.18865	0.121252	8.6943	0.180802	8.56913	0.155041	8.98466	0.334907	9.12048	0.330025		49	-0.721966	0.130232	-0.688999	0.128109	-0.231904	0.117649	-0.290427	0.0996771	-0.474427	0.0431326	-0.494548	0.0725249
50	8.16967	0.201334	8.17736	0.121586	8.68701	0.181127	8.56443	0.155838	8.97686	0.334399	9.11163	0.329127		50	-0.736193	0.131493	-0.700285	0.129361	-0.239193	0.118954	-0.295126	0.100605	-0.482232	0.0446117	-0.503395	0.0734995
51	8.15561	0.202476	8.16452	0.122982	8.68317	0.182301	8.558	0.158055	8.966	0.333894	9.1039	0.328833		51	-0.75025	0.133036	-0.713122	0.130387	-0.243035	0.120753	-0.30155	0.103423	-0.493085	0.0452579	-0.511129	0.074271
52	8.14286	0.203644	8.15164	0.124354	8.67761	0.183396	8.55259	0.159315	8.95736	0.3333	9.09867	0.329549		52	-0.763006	0.134978	-0.726008	0.131025	-0.248595	0.123105	-0.306963	0.104594	-0.501734	0.0460634	-0.516359	0.0754634
53	8.12991	0.205089	8.13812	0.125488	8.66558	0.186493	8.54372	0.16111	8.95006	0.332899	9.09093	0.330364		53	-0.775948	0.137234	-0.73952	0.131476	-0.260625	0.129893	-0.31583	0.106569	-0.509033	0.0460952	-0.524094	0.0762796
54	8.11708	0.206573	8.12304	0.126999	8.65795	0.188099	8.53371	0.162769	8.9424	0.331073	9.08374	0.331284		54	-0.788786	0.139116	-0.754607	0.132481	-0.268253	0.132901	-0.325843	0.108537	-0.516684	0.0460522	-0.531285	0.077349
55	8.10112	0.207689	8.1006	0.130268	8.64583	0.190843	8.5136	0.169088	8.93615	0.33082	9.07703	0.332122		55	-0.804743	0.140778	-0.777044	0.134715	-0.280375	0.137923	-0.345952	0.11503	-0.522938	0.0468127	-0.537991	0.0777488
56	8.08442	0.20826	8.08001	0.133863	8.6372	0.192572	8.4994	0.173251	8.92884	0.329885	9.06951	0.332313		56	-0.82144	0.142309	-0.797631	0.137067	-0.288999	0.140383	-0.360156	0.119398	-0.530249	0.0470581	-0.54552	0.07831
57	8.069	0.209185	8.06596	0.134913	8.62923	0.194241	8.49143	0.174452	8.92356	0.329303	9.06324	0.333056		57	-0.836863	0.143858	-0.811686	0.13719	-0.296972	0.14254	-0.368122	0.121016	-0.535529	0.0462975	-0.551789	0.0789915
58	8.05227	0.211115	8.0528	0.135344	8.62208	0.195927	8.48651	0.174089	8.91678	0.329594	9.06027	0.335383		58	-0.853595	0.146514	-0.824843	0.136877	-0.304119	0.14496	-0.373048	0.121132	-0.542306	0.0460328	-0.554751	0.0795432
59	8.03684	0.213267	8.04055	0.135175	8.61525	0.197201	8.48236	0.173278	8.91176	0.33004	9.05625	0.336779		59	-0.869021	0.149185	-0.837096	0.137577	-0.310949	0.14709	-0.377195	0.120893	-0.547329	0.0446652	-0.558772	0.0800583
60	8.02072	0.215063	8.02618	0.135735	8.60799	0.198563	8.47652	0.17353	8.90484	0.32949	9.0529	0.337968		60	-0.885143	0.151548	-0.851464	0.138959	-0.318214	0.149168	-0.383038	0.121403	-0.554251	0.044817	-0.562124	0.0804194
61	8.00616	0.216934	8.01074	0.136342	8.60287	0.199772	8.47159	0.173881	8.89758	0.329158	9.04741	0.337576		61	-0.899704	0.153624	-0.866906	0.140293	-0.323333	0.150961	-0.387961	0.122093	-0.561508	0.0462363	-0.567613	0.0803108
62	7.99335	0.220071	7.99472	0.138137	8.59826	0.200758	8.46679	0.175237	8.89086	0.32906	9.03821	0.336241		62	-0.912514	0.156469	-0.882922	0.14205	-0.327938	0.152221	-0.392767	0.123373	-0.568224	0.0474532	-0.57682	0.0788928
63	7.98146	0.221702	7.98414	0.137482	8.59973	0.198541	8.4693	0.171764	8.87693	0.328739	9.02935	0.335249		63	-0.924405	0.158352	-0.893501	0.143286	-0.326476	0.148813	-0.390252	0.120322	-0.582155	0.0522739	-0.585674	0.0778419
64	7.9685	0.223538	7.97148	0.138902	8.59359	0.198546	8.4635	0.172452	8.86725	0.328575	9.02915	0.336385		64	-0.937361	0.159864	-0.906163	0.144636	-0.332608	0.147965	-0.396054	0.120368	-0.591839	0.0546945	-0.585879	0.0790181
65	7.95453	0.224432	7.95461	0.14084	8.58237	0.199875	8.45634	0.173072	8.86006	0.328056	9.02687	0.337938		65	-0.951329	0.16081	-0.92303	0.147218	-0.343829	0.150434	-0.403215	0.121097	-0.599027	0.0561855	-0.588151	0.0814097
66	7.94268	0.225007	7.93533	0.143406	8.57482	0.200624	8.44835	0.174201	8.85124	0.32716	9.02031	0.3383		66	-0.96318	0.161264	-0.942314	0.150612	-0.351382	0.151407	-0.411208	0.122289	-0.607852	0.0579512	-0.594713	0.082965
67	7.93091	0.225076	7.91737	0.145382	8.56803	0.201408	8.44063	0.175428	8.8414	0.326213	9.01231	0.338479		67	-0.974952	0.161271	-0.960274	0.152562	-0.358172	0.152385	-0.418927	0.123477	-0.617687	0.0600237	-0.602717	0.0844536
68	7.91815	0.226331	7.90249	0.14755	8.56331	0.203153	8.43355	0.176741	8.83355	0.325222	9.00561	0.338483		68	-0.987715	0.162388	-0.975157	0.153926	-0.362891	0.154355	-0.426003	0.125044	-0.62554	0.0619051	-0.609413	0.085164
69	7.90322	0.227142	7.88577	0.14922	8.55803	0.204258	8.42617	0.178222	8.82521	0.324923	8.99934	0.338569		69	-1.00264	0.163383	-0.991879	0.155185	-0.368172	0.155466	-0.433382	0.126693	-0.633883	0.0632585	-0.615682	0.0852447
70	7.88393	0.227625	7.86664	0.150936	8.54671	0.206013	8.41368	0.180278	8.81679	0.324885	8.99282	0.338473		70	-1.02193	0.164504	-1.01101	0.156933	-0.379494	0.159077	-0.445877	0.129791	-0.642301	0.0646782	-0.62221	0.0853663
71	7.86276	0.228408	7.8488	0.152411	8.53464	0.208472	8.40343	0.182522	8.81094	0.324485	8.98693	0.338523		71	-1.04311	0.165919	-1.02884	0.15797	-0.391565	0.163287	-0.456123	0.13277	-0.648151	0.06573	-0.628098	0.0854087
72	7.84228	0.229568	7.83298	0.153942	8.52607	0.210374	8.39541	0.183781	8.80365	0.324429	8.98074	0.338726		72	-1.06358	0.167532	-1.04467	0.159216	-0.400129	0.166301	-0.464141	0.13434	-0.655443	0.0670905	-0.634283	0.0860832
73	7.80979	0.235245	7.81633	0.157115	8.53948	0.199378	8.38452	0.187231	8.79624	0.324815	8.97446	0.338354		73	-1.09607	0.171475	-1.06131	0.160882	-0.386719	0.164642	-0.475033	0.137459	-0.662853	0.0682172	-0.640563	0.086304
74	7.78595	0.238828	7.80405	0.157238	8.53897	0.197468	8.37888	0.187239	8.79068	0.324691	8.9648	0.33683		74	-1.11991	0.174316	-1.0736	0.160842	-0.387228	0.166135	-0.480674	0.137964	-0.668411	0.0692837	-0.650227	0.0866118
75	7.76561	0.240767	7.79106	0.157099	8.54612	0.192774	8.37199	0.187582	8.78337	0.324484	8.95715	0.336243		75	-1.14025	0.176312	-1.08658	0.160927	-0.380082	0.156679	-0.487569	0.138508	-0.675719	0.0698658	-0.657877	0.0870704
76	7.71218	0.260623	7.77889	0.157779	8.54637	0.191097	8.36768	0.187084	8.77787	0.324026	8.9508	0.336036		76	-1.19368	0.200451	-1.09876	0.161857	-0.379835	0.152531	-0.491877	0.137762	-0.681222	0.0704454	-0.664227	0.0870714
77	7.68524	0.266692	7.76931	0.158468	8.53968	0.192001	8.3627	0.187465	8.77067	0.323872	8.94265	0.336083		77	-1.22063	0.207538	-1.10833	0.16086	-0.386527	0.153333	-0.49685	0.137905	-0.688418	0.070012	-0.672372	0.0869898
78	7.66884	0.267285	7.75735	0.159737	8.5344	0.193663	8.35585	0.187709	8.76541	0.322858	8.93561	0.33662		78	-1.23703	0.207945	-1.12029	0.161641	-0.391807	0.154847	-0.503706	0.137942	-0.693674	0.0706663	-0.679413	0.0870605
79	7.64415	0.269873	7.73527	0.16074	8.52514	0.195528	8.33948	0.191973	8.7616	0.32313	8.92878	0.336655		79	-1.26171	0.211111	-1.14238	0.164567	-0.401066	0.156788	-0.520074	0.141909	-0.697486	0.0711026	-0.686242	0.0863616
80	7.63043	0.26751	7.68208	0.170151	8.51834	0.196849	8.32894	0.193266	8.75798	0.323914	8.92201	0.336424		80	-1.27543	0.208549	-1.19557	0.191305	-0.407865	0.158217	-0.530617	0.143369	-0.701108	0.0702883	-0.693017	0.0859587
81	7.61369	0.267609	7.68505	0.166611	8.51177	0.197759	8.31935	0.193791	8.75182	0.32372	8.91472	0.337		81	-1.29217	0.208984	-1.19259	0.180402	-0.414429	0.158869	-0.540203	0.144092	-0.707271	0.0701415	-0.700307	0.0864737
82	7.5981	0.26784	7.68821	0.164192	8.50415	0.198662	8.30976	0.19417	8.7481	0.324126	8.91266	0.33898		82	-1.30776	0.20943	-1.18943	0.170227	-0.422051	0.159597	-0.549798	0.145159	-0.71099	0.0691935	-0.702362	0.0864598
83	7.58218	0.268519	7.67449	0.165562	8.49773	0.19989	8.2993	0.19523	8.74354	0.324661	8.90865	0.339602		83	-1.32368	0.210256	-1.20315	0.170547	-0.428473	0.160485	-0.560255	0.146639	-0.715548	0.0689653	-0.706381	0.0863798
84	7.56559	0.269049	7.66155	0.166905	8.49083	0.201234	8.29024	0.196061	8.73885	0.324574	8.90464	0.339962		84	-1.34027	0.210902	-1.21609	0.171422	-0.435375	0.161683	-0.569316	0.14765	-0.720234	0.0685425	-0.710384	0.0864939
85	7.54927	0.269854	7.64884	0.168414	8.483	0.202204	8.28311	0.196415	8.73387	0.324417	8.89818	0.339033		85	-1.35659	0.211843	-1.2288	0.172964	-0.443206	0.162581	-0.576441	0.148204	-0.72522	0.0690216	-0.71685	0.0865566
86	7.53496	0.271581	7.63675	0.170433	8.47604	0.20387	8.27974	0.197551	8.72802	0.324212	8.88815	0.337044		86	-1.3709	0.213446	-1.24089	0.17473	-0.450158	0.16404	-0.579814	0.149225	-0.731071	0.0699605	-0.726876	0.0853461
87	7.52109	0.273386	7.62826	0.171117	8.47017	0.204277	8.28328	0.194479	8.72426	0.324825	8.87893	0.335863		87	-1.38478	0.215365	-1.24938	0.175945	-0.456035	0.164234	-0.576271	0.145465	-0.73483	0.0701206	-0.736093	0.0850082
88	7.50461	0.274707	7.62149	0.171754	8.46063	0.204718	8.27691	0.193775	8.72468	0.325005	8.87605	0.335942		88	-1.40125	0.21665	-1.25616	0.174816	-0.465574	0.164314	-0.582646	0.144213	-0.734405	0.0695624	-0.73898	0.0865151
89	7.48806	0.276262	7.61003	0.173519	8.44966	0.205235	8.26752	0.19375	8.71752	0.323456	8.87059	0.335555		89	-1.4178	0.218229	-1.26762	0.175792	-0.476543	0.164916	-0.592033	0.143995	-0.741567	0.0711305	-0.744432	0.0884988
90	7.47092	0.277736	7.5978	0.174667	8.43966	0.206201	8.25956	0.19372	8.7079	0.321586	8.86268	0.335414		90	-1.43494	0.21975	-1.27984	0.176842	-0.48654	0.166154	-0.599999	0.143683	-0.751187	0.0735174	-0.752343	0.0905724
91	7.4566	0.279544	7.58706	0.176783	8.43273	0.208032	8.25341	0.19429	8.69914	0.320572	8.85599	0.335303		91	-1.44926	0.22126	-1.29058	0.178381	-0.493468	0.167839	-0.606141	0.143928	-0.75995	0.0754858	-0.759037	0.0920264
92	7.44173	0.281081	7.57565	0.179408	8.42556	0.209541	8.24568	0.19502	8.69015	0.319898	8.84953	0.334567		92	-1.46413	0.222673	-1.302	0.181005	-0.500639	0.169293	-0.613873	0.144563	-0.768941	0.0772185	-0.7655	0.0924964
93	7.42621	0.281871	7.5625	0.180868	8.41645	0.209825	8.23784	0.195571	8.68761	0.322776	8.84004	0.333389		93	-1.47965	0.223628	-1.31514	0.18276	-0.50975	0.169803	-0.621715	0.145144	-0.771483	0.0799536	-0.774989	0.0924734
94	7.41011	0.282693	7.54701	0.182822	8.40729	0.210446	8.22762	0.195736	8.68591	0.324197	8.83192	0.332077		94	-1.49576	0.224604	-1.33063	0.185009	-0.518908	0.170442	-0.631939	0.145165	-0.773183	0.0804603	-0.783105	0.0921247
95	7.39656	0.283827	7.5344	0.184684	8.39995	0.211508	8.21922	0.196995	8.67979	0.324389	8.82696	0.332125		95	-1.5093	0.225655	-1.34324	0.186405	-0.526249	0.171259	-0.640334	0.146525	-0.779302	0.0795868	-0.788067	0.0916185
96	7.38247	0.284532	7.5206	0.186382	8.39056	0.212572	8.21046	0.197586	8.67214	0.324715	8.81893	0.333658		96	-1.5234	0.226328	-1.35704	0.189052	-0.53564	0.171951	-0.649094	0.147103	-0.786945	0.0791199	-0.796092	0.0928215
97	7.34953	0.293716	7.50469	0.190063	8.37942	0.217205	8.20308	0.2007	8.66685	0.325869	8.81316	0.336785		97	-1.55633	0.233313	-1.37295	0.191268	-0.546781	0.17321	-0.656477	0.149274	-0.792236	0.0785932	-0.801867	0.0940684
98	7.32954	0.297685	7.4975	0.190442	8.37349	0.216578	8.19864	0.198082	8.6616	0.326465	8.80584	0.336686		98	-1.57632	0.236612	-1.38014	0.19154	-0.552712	0.170519	-0.66091	0.146338	-0.797489	0.0780706	-0.809188	0.0940751
99	7.31602	0.299184	7.48736	0.19308	8.36707	0.217098	8.19846	0.197554	8.6543	0.327015	8.7945	0.335455		99	-1.58984	0.238029	-1.39028	0.193513	-0.559136	0.169533	-0.661093	0.144122	-0.804788	0.0784626	-0.820531	0.0930183
100	7.31024	0.302347	7.47609	0.197441	8.35751	0.218358	8.19409	0.197793	8.6473	0.328066	8.7839	0.334926		100	-1.59562	0.24101	-1.40156	0.197228	-0.56869	0.169805	-0.665466	0.143398	-0.81179	0.0789948	-0.831126	0.0928363
101	7.29754	0.304591	7.46387	0.200306	8.3492	0.220012	8.18457	0.198736	8.64087	0.328522	8.77939	0.335275		101	-1.60832	0.243187	-1.41378	0.199851	-0.577	0.170703	-0.674984	0.144408	-0.81822	0.0788134	-0.835634	0.0930053
102	7.27704	0.306554	7.4496	0.201848	8.34247	0.221416	8.17441	0.200244	8.63599	0.328561	8.77903	0.337596		102	-1.62882	0.245046	-1.42804	0.201067	-0.583733	0.17189	-0.685147	0.145975	-0.823095	0.0787753	-0.835993	0.0945204
103	7.26086	0.306755	7.43545	0.204381	8.33351	0.222738	8.15279	0.205652	8.62955	0.328363	8.77498	0.339858		103	-1.645	0.245178	-1.44219	0.202377	-0.592691	0.174013	-0.706762	0.151216	-0.829542	0.0786382	-0.840045	0.0962832
104	7.24339	0.308261	7.41921	0.208918	8.32571	0.223654	8.13649	0.210446	8.62671	0.327538	8.76848	0.342025		104	-1.66247	0.246762	-1.45843	0.205	-0.600492	0.17536	-0.723067	0.156003	-0.832382	0.0791428	-0.846551	0.0985342
105	7.22703	0.309669	7.40582	0.210896	8.31741	0.224197	8.13073	0.210039	8.62362	0.327184	8.76145	0.34351		105	-1.67883	0.248318	-1.47183	0.206555	-0.608791	0.175872	-0.728819	0.155651	-0.835466	0.079059	-0.853572	0.100004
106	7.21486	0.309836	7.3955	0.211343	8.30851	0.225719	8.12735	0.208664	8.62048	0.327411	8.75571	0.345476		106	-1.691	0.248731	-1.48214	0.206982	-0.617687	0.176774	-0.732203	0.154491	-0.838609	0.0791114	-0.859315	0.101106
107	7.20243	0.309868	7.3844	0.211409	8.29938	0.226997	8.12216	0.207947	8.61677	0.327513	8.74877	0.346278		107	-1.70343	0.249019	-1.49325	0.207179	-0.626823	0.177574	-0.737396	0.153868	-0.842316	0.079067	-0.866261	0.101858
108	7.18781	0.311494	7.37269	0.21186	8.29131	0.22841	8.11601	0.20773	8.61483	0.32887	8.74183	0.346989		108	-1.71805	0.250691	-1.50495	0.207725	-0.634892	0.178555	-0.743544	0.153559	-0.844259	0.0782846	-0.873193	0.103203
109	7.17266	0.313473	7.36098	0.21298	8.28262	0.229374	8.10859	0.208199	8.60777	0.327898	8.73195	0.346321		109	-1.7332	0.252604	-1.51667	0.208534	-0.643587	0.179188	-0.750962	0.15387	-0.85132	0.0807784	-0.883075	0.103051
110	7.16048	0.315422	7.34873	0.214433	8.27306	0.23028	8.10464	0.208218	8.60024	0.327831	8.71909	0.345624		110	-1.74538	0.254501	-1.52891	0.209672	-0.653141	0.179797	-0.754917	0.153965	-0.858845	0.0827034	-0.895938	0.10309
111	7.12887	0.327544	7.34026	0.214451	8.26705	0.228902	8.10511	0.205707	8.61623	0.33224	8.71928	0.342788		111	-1.777	0.265691	-1.53738	0.210273	-0.659154	0.178036	-0.754445	0.151309	-0.842858	0.0827183	-0.895745	0.0993307
112	7.12284	0.324965	7.33205	0.215475	8.25796	0.228352	8.09671	0.20615	8.5893	0.329223	8.7189	0.34109		112	-1.78302	0.263431	-1.54559	0.209429	-0.668241	0.177212	-0.762846	0.151395	-0.869788	0.083303	-0.896129	0.0975934
113	7.11216	0.324979	7.31964	0.216544	8.2475	0.228914	8.08915	0.20591	8.583	0.329349	8.71535	0.339603		113	-1.7937	0.263582	-1.55801	0.210403	-0.678706	0.177478	-0.770405	0.151209	-0.876085	0.0841735	-0.899679	0.0961745
114	7.10694	0.321914	7.30586	0.217791	8.27199	0.207695	8.07827	0.207319	8.57539	0.32938	8.70939	0.338726		114	-1.79892	0.261146	-1.57178	0.211963	-0.654214	0.167715	-0.781285	0.152562	-0.883701	0.0856525	-0.905638	0.0957442
115	7.07983	0.330023	7.29386	0.218946	8.26239	0.208867	8.07082	0.206695	8.56891	0.329343	8.70264	0.339074		115	-1.82604	0.268609	-1.58378	0.213459	-0.66381	0.168508	-0.788736	0.152172	-0.890178	0.0868682	-0.912391	0.0965529
116	7.06076	0.333992	7.28188	0.220379	8.25061	0.21073	8.06178	0.207631	8.56234	0.329345	8.69753	0.339824		116	-1.84511	0.272471	-1.59577	0.214773	-0.675595	0.169461	-0.797776	0.153018	-0.896745	0.0876789	-0.917496	0.0975473
117	7.04819	0.334586	7.26949	0.221787	8.2398	0.212735	8.05405	0.2081	8.55561	0.329043	8.69004	0.340206		117	-1.85767	0.27313	-1.60816	0.216455	-0.686404	0.170547	-0.8055	0.15356	-0.903481	0.0883233	-0.92499	0.0981666
118	7.03629	0.334637	7.2559	0.223203	8.22839	0.214569	8.04502	0.208319	8.54953	0.329179	8.68575	0.339471		118	-1.86957	0.273327	-1.62174	0.218035	-0.697807	0.171775	-0.814533	0.153798	-0.909557	0.0889066	-0.929275	0.0972023
119	7.02608	0.334795	7.24529	0.224289	8.22204	0.216411	8.03984	0.209101	8.54375	0.329057	8.68097	0.338095		119	-1.87979	0.273606	-1.63236	0.219156	-0.704167	0.173282	-0.819717	0.154579	-0.915339	0.0891833	-0.934058	0.0959939
120	7.01456	0.334652	7.23061	0.225083	8.20974	0.217268	8.02908	0.209562	8.53817	0.329791	8.67638	0.337805		120	-1.8913	0.273368	-1.64704	0.219629	-0.716463	0.173761	-0.830473	0.154961	-0.920915	0.090065	-0.938647	0.0955263
121	7.00332	0.334243	7.21873	0.225781	8.2011	0.218154	8.01923	0.209598	8.53165	0.329573	8.66842	0.337736		121	-1.90254	0.27297	-1.65892	0.219955	-0.725099	0.174582	-0.840326	0.154962	-0.927435	0.0908819	-0.946603	0.0960681
122	6.99265	0.334385	7.20757	0.226354	8.1923	0.218643	8.0119	0.209497	8.52869	0.329763	8.66236	0.336527		122	-1.91321	0.273305	-1.67008	0.2205	-0.733905	0.174951	-0.847652	0.154878	-0.930398	0.0914547	-0.952664	0.0958096
123	6.9824	0.333439	7.19558	0.227159	8.1826	0.219256	8.00262	0.210069	8.52775	0.330581	8.65825	0.33645		123	-1.92346	0.272539	-1.68206	0.221118	-0.743603	0.175615	-0.856937	0.155409	-0.931341	0.0914875	-0.95678	0.0957281
124	6.96824	0.334607	7.18354	0.227972	8.17441	0.219544	7.99367	0.210952	8.52708	0.331651	8.65456	0.336297		124	-1.93762	0.273655	-1.6941	0.221747	-0.751796	0.176156	-0.865879	0.156247	-0.932004	0.0919551	-0.960463	0.0953768
125	6.95338	0.335847	7.16999	0.227923	8.16565	0.220915	7.98227	0.210961	8.52445	0.332159	8.6499	0.337399		125	-1.95248	0.275043	-1.70766	0.221484	-0.760555	0.177301	-0.87728	0.156248	-0.934637	0.0919298	-0.965126	0.0963639
126	6.93991	0.337167	7.15849	0.227737	8.15782	0.221719	7.97322	0.210905	8.52112	0.332226	8.6514	0.338302		126	-1.96595	0.276399	-1.71916	0.220991	-0.768382	0.178241	-0.886337	0.156248	-0.937965	0.0922098	-0.963628	0.0965111
127	6.92646	0.337276	7.14438	0.230529	8.1495	0.222148	7.9514	0.216607	8.51516	0.332262	8.64775	0.339391		127	-1.9794	0.276641	-1.73326	0.22313	-0.776705	0.180106	-0.908152	0.161933	-0.943934	0.0920836	-0.967276	0.0975031
128	6.90767	0.339306	7.13051	0.23185	8.14055	0.223013	7.9386	0.217113	8.51201	0.331992	8.64222	0.341052		128	-1.99819	0.278696	-1.74714	0.223705	-0.785655	0.181543	-0.920955	0.162223	-0.947081	0.0927784	-0.972804	0.0991448
129	6.89147	0.340494	7.11721	0.231684	8.13122	0.224041	7.92571	0.216151	8.50925	0.331412	8.637	0.342266		129	-2.01439	0.279975	-1.76043	0.223259	-0.794978	0.182542	-0.933839	0.161993	-0.949838	0.0930297	-0.97803	0.100005
130	6.87769	0.340864	7.10764	0.230382	8.1217	0.224983	7.91983	0.214247	8.50722	0.332028	8.63485	0.344381		130	-2.02817	0.280516	-1.77	0.221984	-0.804498	0.183249	-0.939726	0.160095	-0.951867	0.0931609	-0.980172	0.100905
131	6.86363	0.341075	7.09627	0.229088	8.11046	0.226381	7.91497	0.212485	8.5001	0.331473	8.63145	0.345593		131	-2.04223	0.280845	-1.78138	0.221036	-0.815745	0.184101	-0.944587	0.158403	-0.958992	0.0936881	-0.983577	0.101668
132	6.85153	0.340966	7.08524	0.228719	8.0995	0.227499	7.90487	0.213143	8.49284	0.330342	8.62674	0.347168		132	-2.05434	0.280917	-1.7924	0.220364	-0.826701	0.184914	-0.954682	0.159077	-0.966247	0.0947116	-0.988282	0.103328
133	6.83911	0.340415	7.07306	0.228432	8.09076	0.229443	7.90009	0.212465	8.48477	0.330221	8.61932	0.346465		133	-2.06676	0.280641	-1.80459	0.220084	-0.835438	0.186482	-0.959464	0.158202	-0.974314	0.0959483	-0.995702	0.103288
134	6.82882	0.340321	7.06095	0.228277	8.08157	0.230466	7.89192	0.212922	8.47484	0.33024	8.6075	0.344858		134	-2.07704	0.280697	-1.81669	0.220081	-0.844635	0.187374	-0.967634	0.15895	-0.984246	0.0968363	-1.00753	0.102793
135	6.79429	0.352745	7.05156	0.227576	8.0735	0.229462	7.89052	0.209099	8.46638	0.331748	8.60059	0.343155		135	-2.11157	0.292154	-1.82609	0.219817	-0.8527	0.186102	-0.969037	0.154967	-0.99271	0.0983294	-1.01444	0.101249
136	6.78974	0.349312	7.0435	0.227102	8.06153	0.228348	7.88052	0.208955	8.45775	0.331968	8.59162	0.341732		136	-2.11613	0.28917	-1.83415	0.218514	-0.864671	0.185258	-0.979029	0.154617	-1.00134	0.0988697	-1.02341	0.100808
137	6.77705	0.349442	7.02976	0.226823	8.05131	0.229649	7.87101	0.207917	8.45123	0.331499	8.58446	0.341063		137	-2.12881	0.289659	-1.84788	0.218753	-0.874888	0.186342	-0.98854	0.153808	-1.00786	0.0996237	-1.03056	0.101331
138	6.76438	0.349365	7.01622	0.226503	8.0405	0.23043	7.85899	0.208074	8.45421	0.327616	8.57837	0.340528		138	-2.14148	0.289901	-1.86142	0.218778	-0.885697	0.187364	-1.00057	0.15408	-1.00488	0.0995393	-1.03666	0.101461
139	6.74981	0.350501	7.00282	0.226136	8.02919	0.231147	7.84841	0.208245	8.4568	0.324451	8.5715	0.34043		139	-2.15605	0.291267	-1.87483	0.218606	-0.897015	0.188358	-1.01114	0.154487	-1.00229	0.100659	-1.04353	0.101701
140	6.7338	0.350441	6.98758	0.225489	8.01559	0.232011	7.8351	0.207938	8.45325	0.322911	8.56624	0.340827		140	-2.17206	0.290839	-1.89006	0.218105	-0.910612	0.188997	-1.02446	0.153978	-1.00584	0.101796	-1.04879	0.102284
141	6.71496	0.351263	6.97412	0.22514	8.00105	0.234214	7.82129	0.207995	8.45302	0.321458	8.56145	0.340738		141	-2.19091	0.29141	-1.90353	0.217728	-0.925148	0.1917	-1.03826	0.154202	-1.00607	0.102781	-1.05357	0.102854
142	6.70465	0.349112	6.96535	0.225334	7.99636	0.23355	7.81168	0.210387	8.4516	0.320213	8.55656	0.34103		142	-2.20122	0.290595	-1.9123	0.218564	-0.929845	0.195611	-1.04788	0.15695	-1.00749	0.103643	-1.05847	0.103209
143	6.68208	0.354178	6.95297	0.2256	7.97937	0.240131	7.80121	0.212107	8.44775	0.319707	8.55219	0.340111		143	-2.22378	0.295708	-1.92468	0.21934	-0.946831	0.201351	-1.05835	0.159104	-1.01134	0.104433	-1.06284	0.102706
144	6.66077	0.358525	6.94063	0.224978	7.96714	0.243127	7.79217	0.210669	8.44158	0.319792	8.55237	0.335486		144	-2.24509	0.300087	-1.93701	0.219294	-0.959061	0.20423	-1.06739	0.157912	-1.01751	0.105687	-1.06266	0.0990282
145	6.64399	0.360614	6.92958	0.224606	7.95672	0.244771	7.77801	0.210291	8.43657	0.319035	8.54476	0.337053		145	-2.26187	0.302357	-1.94806	0.21893	-0.969485	0.205818	-1.08155	0.158186	-1.02252	0.10668	-1.07027	0.100786
146	6.63103	0.359892	6.91673	0.223897	7.9448	0.245526	7.76753	0.209251	8.43045	0.318247	8.53556	0.336606		146	-2.27483	0.301966	-1.96091	0.21812	-0.981398	0.206602	-1.09202	0.156994	-1.02864	0.108252	-1.07946	0.10182
147	6.61873	0.358909	6.90279	0.222986	7.93469	0.246802	7.75722	0.20817	8.42572	0.317666	8.52904	0.337215		147	-2.28713	0.301386	-1.97485	0.217649	-0.991512	0.207936	-1.10234	0.155887	-1.03337	0.109454	-1.08599	0.102866
148	6.60663	0.358166	6.88973	0.222353	7.9239	0.247792	7.74675	0.207501	8.42092	0.317553	8.52303	0.338139		148	-2.29923	0.30095	-1.98792	0.217165	-1.0023	0.209233	-1.11281	0.155111	-1.03817	0.110655	-1.09199	0.103883
149	6.59478	0.356824	6.8761	0.221495	7.91339	0.248786	7.73349	0.206185	8.41678	0.316848	8.51877	0.340047		149	-2.31108	0.299998	-2.00154	0.216447	-1.01281	0.210554	-1.12606	0.15374	-1.04231	0.111755	-1.09625	0.105675
150	6.58267	0.355533	6.86134	0.220212	7.90366	0.249631	7.71825	0.205805	8.41172	0.317005	8.51989	0.342653		150	-2.32319	0.29923	-2.01631	0.215499	-1.02254	0.211747	-1.1413	0.153479	-1.04737	0.113692	-1.09514	0.10721
151	6.56703	0.35552	6.84058	0.219748	7.89356	0.24995	7.69649	0.208869	8.40245	0.31722	8.51598	0.345635		151	-2.33883	0.299729	-2.03707	0.214534	-1.03264	0.213373	-1.16307	0.156335	-1.05664	0.115852	-1.09905	0.109266
152	6.54755	0.356591	6.82317	0.219472	7.88293	0.249994	7.67666	0.210039	8.39718	0.316633	8.51011	0.346995		152	-2.35831	0.301138	-2.05448	0.214426	-1.04327	0.214633	-1.1829	0.158134	-1.06191	0.117947	-1.10492	0.110798
153	6.53137	0.356708	6.80693	0.217798	7.87255	0.251027	7.65819	0.208266	8.39277	0.315182	8.50264	0.349779		153	-2.3745	0.301631	-2.07072	0.213263	-1.05365	0.216112	-1.20136	0.157552	-1.06632	0.119039	-1.11239	0.1136
154	6.51661	0.356276	6.79188	0.216464	7.86014	0.252062	7.64636	0.208272	8.39068	0.315286	8.50148	0.351086		154	-2.38925	0.301544	-2.08576	0.21229	-1.06606	0.217301	-1.21319	0.158459	-1.06841	0.119764	-1.11355	0.11374
155	6.50207	0.355801	6.77695	0.214885	7.8477	0.254067	7.63578	0.208364	8.38709	0.315569	8.49692	0.353037		155	-2.40379	0.301484	-2.10069	0.211185	-1.0785	0.218928	-1.22378	0.159343	-1.072	0.121177	-1.11811	0.115587
156	6.48819	0.355437	6.76411	0.214537	7.83526	0.254936	7.62331	0.209006	8.38618	0.315563	8.49107	0.3547		156	-2.41767	0.30147	-2.11353	0.210981	-1.09094	0.219975	-1.23624	0.160397	-1.07291	0.12229	-1.12396	0.117752
157	6.47483	0.354802	6.75163	0.214537	7.82404	0.256215	7.61065	0.210142	8.38586	0.316226	8.48273	0.355031		157	-2.43103	0.301229	-2.12602	0.211614	-1.10216	0.221345	-1.2489	0.16191	-1.07323	0.122629	-1.1323	0.118853
158	6.46179	0.355185	6.74118	0.21483	7.81242	0.256825	7.6007	0.210067	8.38479	0.317363	8.47134	0.35388		158	-2.44407	0.301756	-2.13647	0.211528	-1.11378	0.22228	-1.25885	0.162369	-1.0743	0.122196	-1.14368	0.118137
159	6.42996	0.365703	6.73254	0.212893	7.80291	0.255448	7.5907	0.209032	8.38163	0.319533	8.46381	0.351926		159	-2.47591	0.311267	-2.1451	0.20932	-1.12329	0.221696	-1.26886	0.162862	-1.07746	0.12315	-1.15121	0.116735
160	6.42224	0.362397	6.72089	0.212342	7.78843	0.253959	7.57639	0.208765	8.37771	0.320342	8.46147	0.351558		160	-2.48362	0.308624	-2.15676	0.207859	-1.13777	0.221132	-1.28317	0.162867	-1.08138	0.123858	-1.15356	0.116955
161	6.40717	0.362875	6.70463	0.211675	7.76846	0.251778	7.56859	0.205466	8.37466	0.320587	8.46138	0.352305		161	-2.49869	0.309509	-2.17302	0.207815	-1.15774	0.220384	-1.29096	0.158758	-1.08443	0.124827	-1.15365	0.118168
162	6.39188	0.36239	6.68923	0.21069	7.75931	0.254203	7.55633	0.204472	8.36947	0.321075	8.45804	0.352139		162	-2.51398	0.309516	-2.18841	0.207192	-1.16689	0.223035	-1.30323	0.157768	-1.08962	0.126099	-1.15699	0.118697
163	6.37795	0.361632	6.67563	0.209243	7.74899	0.253581	7.55095	0.200821	8.365	0.321473	8.45498	0.351725		163	-2.52791	0.308965	-2.20201	0.205189	-1.17721	0.221836	-1.30861	0.152098	-1.09409	0.127262	-1.16005	0.118568
164	6.36533	0.359899	6.66008	0.207137	7.73474	0.250963	7.53225	0.199197	8.36117	0.321511	8.45304	0.352169		164	-2.54053	0.307494	-2.21757	0.203324	-1.19147	0.219068	-1.3273	0.150484	-1.09792	0.128485	-1.16199	0.119538
165	6.35403	0.358419	6.6449	0.207312	7.72461	0.251232	7.51898	0.199461	8.35639	0.321889	8.44862	0.353065		165	-2.55183	0.306926	-2.23274	0.2046	-1.20159	0.219914	-1.34058	0.151518	-1.1027	0.129733	-1.16641	0.120473
166	6.33893	0.357395	6.62555	0.208986	7.71109	0.252083	7.50445	0.201636	8.35091	0.322647	8.44255	0.35426		166	-2.56693	0.306489	-2.25209	0.208204	-1.21511	0.221297	-1.3551	0.153943	-1.10818	0.130977	-1.17247	0.121903
167	6.32523	0.356939	6.6036	0.21127	7.69895	0.252941	7.4929	0.201888	8.34642	0.323073	8.43839	0.353633		167	-2.58063	0.306599	-2.27404	0.211794	-1.22725	0.223088	-1.36665	0.154571	-1.11267	0.131851	-1.17664	0.121977
168	6.31152	0.357433	6.58803	0.213211	7.68849	0.254603	7.48023	0.202405	8.34082	0.323402	8.43521	0.353284		168	-2.59434	0.307278	-2.28961	0.213374	-1.23771	0.225478	-1.37932	0.155466	-1.11827	0.132858	-1.17981	0.121873

## Sheet: 2.DO consumption_forest soil
a) DO concentrations during the 168h' incubation (mg L-1)															b) DO consumption during the 168h' incubation (Figure 3 b):DOt -DOinital (mg L-1)
Time (h)	SOC+AMO_rotation	SE_1	SOC+AMO_stationary	SE_2	DOC control_ rotation	SE_3	DOC control_ stationary	SE_4	SOC-AMO_ rotation	SE_5	SOC-AMO_ stationary	SE_6			Time (h)	SOC+AMO_rotation	SE_1	SOC+AMO_stationary	SE_2	DOC control_ rotation	SE_3	DOC control_ stationary	SE_4	SOC-AMO_ rotation	SE_5	SOC-AMO_ stationary	SE_6
1	8.21631	0.0925812	8.14156	0.0838796	8.30884	0.126917	8.43403	0.139169	8.29689	0.194221	8.57394	0.166692			1	0	0	0	0	0	0	0	0	0	0	0	0
2	8.16923	0.101213	8.13982	0.0915766	8.29998	0.129896	8.44095	0.144082	8.26416	0.203719	8.57005	0.169825			2	-0.0470866	0.0115518	-0.00173821	0.013753	-0.00886582	0.00806105	0.00692229	0.0110809	-0.0327329	0.011865	-0.00389562	0.00568935
3	8.11784	0.109812	8.12381	0.102163	8.27363	0.139724	8.43218	0.148964	8.24044	0.213234	8.56564	0.175253			3	-0.0984738	0.0252143	-0.0177553	0.0274363	-0.0352142	0.0198576	-0.00184511	0.0253979	-0.056452	0.0231199	-0.00830265	0.0116489
4	8.08547	0.113886	8.11356	0.106989	8.25723	0.146936	8.42849	0.15293	8.21891	0.214969	8.56265	0.180351			4	-0.130841	0.0327955	-0.0280061	0.0338923	-0.0516154	0.0299906	-0.00554322	0.0334646	-0.0779841	0.0268612	-0.0112901	0.0182851
5	8.06403	0.116569	8.10793	0.107814	8.24751	0.150803	8.42341	0.15383	8.20467	0.214941	8.56955	0.185925			5	-0.152283	0.0381892	-0.033635	0.0367217	-0.0613282	0.0362344	-0.0106157	0.0367462	-0.092221	0.0288132	-0.00438719	0.0251937
6	8.05266	0.117593	8.10718	0.107831	8.2451	0.152064	8.4202	0.153998	8.1934	0.213867	8.57042	0.186063			6	-0.163649	0.0412062	-0.0343838	0.0392776	-0.0637443	0.0376296	-0.0138264	0.0379377	-0.103487	0.0300853	-0.00351728	0.0254105
7	8.04568	0.117815	8.10411	0.10762	8.24909	0.156032	8.42167	0.154174	8.18807	0.211939	8.56793	0.185913			7	-0.170634	0.043148	-0.0374538	0.0397547	-0.0597536	0.0420774	-0.0123596	0.0370804	-0.108823	0.0310992	-0.00600878	0.0241452
8	8.04015	0.117402	8.10167	0.107704	8.25369	0.159656	8.41994	0.153819	8.18416	0.209611	8.56556	0.182725			8	-0.17616	0.0445843	-0.0398905	0.03947	-0.0551539	0.0467141	-0.0140847	0.0358768	-0.112733	0.0317411	-0.00838201	0.0206497
9	8.03438	0.116763	8.09996	0.107883	8.25407	0.161027	8.41941	0.15407	8.18027	0.207713	8.56198	0.183519			9	-0.181928	0.0454214	-0.0416031	0.0393654	-0.0547714	0.0479181	-0.0146217	0.0354924	-0.11662	0.0317474	-0.0119649	0.0224591
10	8.02742	0.115752	8.09684	0.107842	8.25424	0.161322	8.41918	0.154416	8.17692	0.206183	8.5603	0.184323			10	-0.188896	0.0457714	-0.0447246	0.0391679	-0.0545999	0.0478834	-0.0148462	0.035278	-0.119967	0.031569	-0.0136383	0.0244571
11	8.01884	0.113715	8.09313	0.107972	8.25442	0.161257	8.41903	0.155115	8.17276	0.204613	8.55842	0.185433			11	-0.197471	0.0453747	-0.0484329	0.0389677	-0.0544196	0.0472858	-0.0149971	0.0356529	-0.12413	0.0317155	-0.0155243	0.0265238
12	8.01341	0.113339	8.09216	0.110261	8.25331	0.161385	8.41862	0.155209	8.17288	0.205842	8.55773	0.186974			12	-0.202902	0.0459063	-0.049402	0.0405895	-0.0555277	0.0469131	-0.0154114	0.0356591	-0.124012	0.0334294	-0.0162155	0.0292409
13	8.00552	0.113382	8.08777	0.110901	8.25355	0.16124	8.41861	0.155641	8.1776	0.20979	8.5575	0.187938			13	-0.210793	0.0467202	-0.053794	0.0407212	-0.0552873	0.0464917	-0.0154234	0.0366236	-0.119289	0.0370999	-0.0164437	0.0311233
14	7.99484	0.113309	8.07724	0.110647	8.25195	0.161654	8.41967	0.156341	8.17012	0.208439	8.55032	0.186229			14	-0.221477	0.0461336	-0.0643232	0.03999	-0.0568934	0.0460393	-0.0143579	0.0375084	-0.126768	0.0358742	-0.023621	0.0311701
15	7.98356	0.11238	8.06505	0.110841	8.24945	0.16224	8.41907	0.157808	8.16307	0.21096	8.54377	0.185238			15	-0.232748	0.0444304	-0.0765153	0.0398192	-0.0593921	0.045846	-0.0149553	0.0396756	-0.133819	0.0368648	-0.0301691	0.0300409
16	7.97439	0.11052	8.05398	0.111205	8.24523	0.162235	8.41783	0.158463	8.15713	0.211555	8.53715	0.183377			16	-0.241928	0.0425079	-0.0875866	0.0399478	-0.0636123	0.0457192	-0.0161976	0.040483	-0.139758	0.0360739	-0.0367933	0.0274869
17	7.96216	0.108347	8.04533	0.110626	8.24259	0.162245	8.41522	0.158219	8.14983	0.210352	8.53453	0.181939			17	-0.254154	0.0413661	-0.0962285	0.040566	-0.066248	0.0459721	-0.0188057	0.0406093	-0.147057	0.0342661	-0.0394135	0.0262394
18	7.95385	0.105482	8.03807	0.109804	8.24179	0.16319	8.41357	0.158381	8.14631	0.210988	8.53224	0.181245			18	-0.262467	0.039905	-0.103488	0.0402284	-0.0670465	0.047257	-0.0204557	0.0412433	-0.150578	0.0350239	-0.0417027	0.0261136
19	7.9457	0.102636	8.03203	0.110148	8.2411	0.16416	8.41126	0.159006	8.13881	0.20931	8.52789	0.181196			19	-0.270615	0.0385897	-0.109536	0.0405961	-0.067746	0.0485772	-0.0227735	0.0416488	-0.158077	0.0336628	-0.0460468	0.0262459
20	7.9347	0.0993605	8.02579	0.110218	8.23974	0.164824	8.4101	0.158898	8.13563	0.209037	8.52435	0.18068			20	-0.281609	0.0383609	-0.11577	0.0410466	-0.0691057	0.0492978	-0.0239297	0.0418439	-0.161258	0.0322864	-0.0495879	0.0262089
21	7.9231	0.0954671	8.01981	0.110773	8.23805	0.165006	8.40735	0.159027	8.12604	0.20746	8.5183	0.181152			21	-0.293212	0.0374617	-0.121749	0.0410943	-0.0707919	0.0493377	-0.0266817	0.0420588	-0.170854	0.0309589	-0.0556458	0.0261585
22	7.91778	0.0961749	8.01605	0.111106	8.23405	0.164989	8.40483	0.158465	8.11886	0.209688	8.50982	0.182098			22	-0.298535	0.0370611	-0.125512	0.0415491	-0.0747908	0.0491336	-0.0292006	0.0422027	-0.178029	0.0312341	-0.0641177	0.0271193
23	7.92212	0.104308	8.00755	0.110451	8.22866	0.164766	8.40339	0.158321	8.10934	0.213702	8.50605	0.17971			23	-0.294189	0.038897	-0.134011	0.0411709	-0.0801835	0.0479346	-0.0306405	0.0422501	-0.187547	0.0355196	-0.0678959	0.0239451
24	7.91296	0.101701	7.99766	0.112248	8.22555	0.164179	8.39685	0.157936	8.08501	0.216804	8.49952	0.179528			24	-0.303352	0.0383011	-0.143898	0.0425572	-0.0832893	0.0476948	-0.0371819	0.0417554	-0.211883	0.0487914	-0.0744203	0.0236965
25	7.9056	0.0990356	7.99022	0.112411	8.22333	0.163083	8.39422	0.15594	8.07009	0.219094	8.49368	0.178095			25	-0.310711	0.0380418	-0.151343	0.0421953	-0.0855069	0.0476924	-0.0398071	0.0419532	-0.226801	0.0509917	-0.0802617	0.0208929
26	7.89616	0.0967946	7.98624	0.112394	8.22144	0.161602	8.3913	0.153939	8.05231	0.222018	8.48411	0.179556			26	-0.320151	0.0378522	-0.155325	0.0425929	-0.0874029	0.0472728	-0.0427243	0.0420079	-0.244579	0.0531839	-0.0898272	0.0208646
27	7.88756	0.0943848	7.97997	0.112782	8.21917	0.161298	8.38942	0.15323	8.03616	0.223655	8.47686	0.180118			27	-0.328748	0.0372685	-0.161589	0.0437709	-0.0896679	0.0469425	-0.0446132	0.0417042	-0.260729	0.0543705	-0.097079	0.0205926
28	7.87891	0.0921095	7.97468	0.113464	8.21711	0.161201	8.38912	0.153799	8.02087	0.224777	8.46831	0.180381			28	-0.337405	0.0374658	-0.166887	0.0446848	-0.0917264	0.045866	-0.0449126	0.0415698	-0.276019	0.0549369	-0.105631	0.020512
29	7.87016	0.0907259	7.97209	0.114891	8.21565	0.161745	8.38891	0.155329	8.00758	0.226133	8.46375	0.180689			29	-0.346149	0.0381427	-0.169475	0.0472747	-0.0931947	0.0457468	-0.0451172	0.0426648	-0.289313	0.0555317	-0.110195	0.0202849
30	7.86285	0.0900724	7.96977	0.118208	8.21758	0.162524	8.39083	0.156939	7.99741	0.228461	8.45843	0.182371			30	-0.353467	0.0388374	-0.171796	0.0504779	-0.0912632	0.0463141	-0.0432009	0.0441137	-0.299483	0.0562145	-0.11551	0.0217559
31	7.85856	0.0891853	7.96614	0.118808	8.21869	0.162334	8.39465	0.158535	7.9906	0.22946	8.45812	0.183007			31	-0.357755	0.039471	-0.17542	0.051237	-0.0901479	0.0454366	-0.0393742	0.0443185	-0.306289	0.0564898	-0.115818	0.0222577
32	7.85625	0.0884607	7.96512	0.119344	8.22138	0.162043	8.39326	0.15974	7.98458	0.229998	8.45898	0.182192			32	-0.360059	0.0407015	-0.176444	0.0517415	-0.0874595	0.0450042	-0.0407728	0.0440372	-0.312312	0.0561911	-0.114963	0.0210408
33	7.85352	0.0872082	7.96454	0.120818	8.22407	0.161197	8.39385	0.160767	7.97765	0.230345	8.45788	0.181568			33	-0.362795	0.0418267	-0.177018	0.0529446	-0.0847729	0.0441878	-0.0401778	0.0439205	-0.319244	0.0559173	-0.116061	0.0204771
34	7.84989	0.0864826	7.96139	0.120781	8.22694	0.160544	8.39469	0.161611	7.97063	0.230413	8.45517	0.181327			34	-0.366423	0.0426429	-0.180169	0.0533843	-0.0818991	0.0434976	-0.0393411	0.0441769	-0.326266	0.0558657	-0.11877	0.0205422
35	7.84564	0.0859924	7.95843	0.121581	8.22767	0.160195	8.39431	0.162134	7.96338	0.230971	8.4521	0.181695			35	-0.370671	0.0433242	-0.183133	0.0544375	-0.081174	0.043271	-0.0397147	0.0441573	-0.333514	0.056325	-0.121841	0.021305
36	7.84016	0.0848627	7.95227	0.121124	8.22585	0.160324	8.39081	0.161606	7.95504	0.231098	8.44723	0.180728			36	-0.376157	0.0439883	-0.189291	0.0544631	-0.0829901	0.0433482	-0.0432197	0.0425238	-0.341849	0.0564811	-0.126707	0.0207775
37	7.83347	0.0838245	7.94442	0.119185	8.22408	0.160551	8.38631	0.160931	7.94515	0.229668	8.44072	0.179501			37	-0.382839	0.0446222	-0.197143	0.0532507	-0.0847662	0.043522	-0.0477156	0.0409348	-0.351745	0.0555489	-0.133224	0.0206064
38	7.82425	0.0840539	7.9353	0.118088	8.21718	0.162008	8.38245	0.159801	7.93159	0.228984	8.43276	0.177831			38	-0.392062	0.0442232	-0.206265	0.0518788	-0.0916617	0.0448029	-0.0515838	0.0400361	-0.365298	0.0549137	-0.141185	0.0203894
39	7.81268	0.0850086	7.92252	0.11785	8.21111	0.162796	8.37471	0.159149	7.91641	0.230546	8.42014	0.176572			39	-0.403632	0.0432998	-0.21904	0.0513886	-0.09773	0.0453472	-0.0593184	0.0401315	-0.380478	0.0557207	-0.153806	0.0197996
40	7.8007	0.0857745	7.91035	0.118015	8.20527	0.163649	8.36861	0.158709	7.90244	0.231648	8.4095	0.175184			40	-0.41561	0.0419965	-0.231214	0.0518112	-0.103568	0.0463266	-0.0654172	0.0404314	-0.394452	0.0563315	-0.164441	0.0180394
41	7.79027	0.0865692	7.89867	0.118918	8.19845	0.164511	8.36176	0.158339	7.89155	0.232717	8.39956	0.174243			41	-0.426046	0.0412965	-0.242895	0.0529697	-0.110392	0.0475115	-0.072273	0.0410288	-0.405344	0.0566014	-0.174379	0.0170833
42	7.78091	0.0870332	7.88919	0.119315	8.19164	0.165216	8.35551	0.158533	7.88245	0.233305	8.39168	0.173594			42	-0.435406	0.0405441	-0.252376	0.0538323	-0.117201	0.0482673	-0.0785157	0.041717	-0.414437	0.0564829	-0.182265	0.0164275
43	7.77459	0.0874454	7.88388	0.121351	8.18794	0.165731	8.35217	0.158851	7.87564	0.23352	8.3864	0.173015			43	-0.441722	0.0405796	-0.257683	0.0559594	-0.120899	0.0488052	-0.0818592	0.0422779	-0.421247	0.0561881	-0.187543	0.0147628
44	7.77022	0.0877271	7.87929	0.122269	8.18682	0.165809	8.34986	0.15851	7.87043	0.23324	8.38269	0.172392			44	-0.446097	0.0411165	-0.262269	0.0568788	-0.122024	0.0491197	-0.0841699	0.0426257	-0.426463	0.0560562	-0.19125	0.0142177
45	7.76357	0.088256	7.87371	0.122562	8.18465	0.166473	8.34697	0.159016	7.86599	0.233057	8.38113	0.171346			45	-0.45274	0.0413122	-0.267854	0.0573845	-0.124195	0.049964	-0.087059	0.0434344	-0.430901	0.0561113	-0.19281	0.0141659
46	7.75622	0.0891882	7.86666	0.123543	8.18168	0.167283	8.3438	0.160192	7.90813	0.206624	8.37628	0.170874			46	-0.460096	0.0419588	-0.274906	0.0586031	-0.12716	0.0504544	-0.0902294	0.0440306	-0.388759	0.0538047	-0.19766	0.0150799
47	7.7501	0.0902258	7.86031	0.123768	8.17704	0.168236	8.3403	0.160964	7.95401	0.18496	8.37197	0.170869			47	-0.466214	0.0428501	-0.281248	0.0592552	-0.131797	0.0510279	-0.0937289	0.0446982	-0.342878	0.0797164	-0.201975	0.0158006
48	7.74463	0.0903451	7.85447	0.124142	8.17524	0.167995	8.33926	0.161242	7.94487	0.186325	8.36741	0.170614			48	-0.471686	0.0420646	-0.287094	0.0597571	-0.1336	0.0504139	-0.0947679	0.0444749	-0.352022	0.0762147	-0.206534	0.0161634
49	7.73751	0.0907783	7.84755	0.124343	8.17397	0.168703	8.33482	0.161761	7.93197	0.188326	8.36256	0.170401			49	-0.478804	0.0411726	-0.294013	0.0603139	-0.134872	0.0503833	-0.0992114	0.0449023	-0.364923	0.0773416	-0.211386	0.0159352
50	7.73049	0.09102	7.84146	0.124737	8.17094	0.168297	8.33166	0.161144	7.92367	0.189314	8.35537	0.17082			50	-0.485822	0.0405661	-0.300104	0.0605318	-0.137902	0.0501828	-0.102369	0.0445028	-0.373225	0.0766713	-0.218574	0.0155641
51	7.72538	0.0909706	7.8365	0.124412	8.17076	0.166666	8.33159	0.160244	7.91907	0.188827	8.34734	0.171868			51	-0.490935	0.0387	-0.305059	0.0602624	-0.138078	0.0488063	-0.10244	0.0431424	-0.377824	0.0755115	-0.226604	0.0153376
52	7.71996	0.0915987	7.82983	0.124467	8.16918	0.165177	8.33116	0.160028	7.91339	0.188758	8.34141	0.171549			52	-0.496355	0.0380648	-0.311735	0.0606653	-0.139666	0.0474858	-0.102873	0.0425719	-0.383497	0.0751657	-0.232535	0.0152576
53	7.71278	0.0923086	7.82394	0.12566	8.1682	0.164171	8.33157	0.160784	7.90844	0.189348	8.3374	0.172063			53	-0.503529	0.0372814	-0.317626	0.0618572	-0.14064	0.0467887	-0.10246	0.0444758	-0.388451	0.0754793	-0.236543	0.0161323
54	7.70694	0.0936233	7.81853	0.128299	8.16881	0.163987	8.33065	0.162076	7.90682	0.190294	8.33415	0.173329			54	-0.50937	0.0374761	-0.323032	0.0643299	-0.140035	0.0474353	-0.103383	0.0468251	-0.390068	0.0759524	-0.239795	0.017269
55	7.70294	0.0945942	7.81257	0.131	8.17132	0.162783	8.32998	0.162914	7.90788	0.189999	8.33597	0.174445			55	-0.513368	0.0387927	-0.328988	0.0667112	-0.137522	0.0472121	-0.104047	0.0484946	-0.389015	0.076575	-0.237973	0.020024
56	7.69791	0.0956439	7.80719	0.132514	8.1725	0.16243	8.32614	0.164356	7.90774	0.189719	8.33706	0.175273			56	-0.518398	0.0409232	-0.334369	0.0682246	-0.136344	0.0475315	-0.107885	0.0505613	-0.389155	0.0773622	-0.236885	0.02201
57	7.69139	0.0964431	7.80104	0.134213	8.1737	0.161836	8.32353	0.16556	7.90647	0.189401	8.33641	0.175771			57	-0.524921	0.0421517	-0.340527	0.0699012	-0.135139	0.0474543	-0.110496	0.0516961	-0.390419	0.0780588	-0.237528	0.0233944
58	7.68262	0.0972859	7.79282	0.135528	8.1727	0.161375	8.31861	0.166412	7.90339	0.18898	8.33532	0.175778			58	-0.53369	0.0430773	-0.348742	0.0713795	-0.136146	0.0479479	-0.115422	0.0529981	-0.393506	0.0787589	-0.238623	0.0247014
59	7.673	0.0974751	7.78394	0.136704	8.17116	0.161335	8.31366	0.166911	7.89887	0.188933	8.33406	0.176052			59	-0.543315	0.0436929	-0.357624	0.0728325	-0.137683	0.0486549	-0.12037	0.0538705	-0.398019	0.0796034	-0.239886	0.0252616
60	7.66158	0.0970782	7.7736	0.136782	8.1695	0.161735	8.30598	0.166379	7.89432	0.188325	8.33184	0.175722			60	-0.554728	0.0448976	-0.367963	0.0734268	-0.139338	0.049728	-0.128047	0.0530578	-0.402566	0.0803817	-0.242097	0.0264168
61	7.64956	0.0967866	7.76118	0.136366	8.16705	0.161845	8.30125	0.16636	7.88974	0.186214	8.32852	0.174251			61	-0.566755	0.0459968	-0.38038	0.0735229	-0.141794	0.0500774	-0.13278	0.0525255	-0.407154	0.0802155	-0.24542	0.0263253
62	7.63542	0.09737	7.74893	0.136094	8.16112	0.162243	8.29643	0.16551	7.88044	0.185412	8.32261	0.172787			62	-0.580896	0.0465551	-0.39263	0.0736315	-0.147717	0.0500324	-0.137598	0.0525137	-0.416452	0.0799272	-0.251328	0.0255752
63	7.61968	0.0981681	7.73524	0.136375	8.15251	0.163718	8.29044	0.166116	7.86927	0.185958	8.31317	0.171463			63	-0.59663	0.045753	-0.40632	0.0741337	-0.156328	0.0506696	-0.143584	0.0526601	-0.42762	0.0796204	-0.260771	0.024611
64	7.6051	0.0986611	7.72255	0.137411	8.14394	0.166115	8.28351	0.166923	7.86124	0.186548	8.30592	0.171077			64	-0.611217	0.0458274	-0.419017	0.0754987	-0.164901	0.0532386	-0.150518	0.0542457	-0.435655	0.0796799	-0.268026	0.0240165
65	7.59062	0.0994919	7.71096	0.13811	8.13604	0.168029	8.27827	0.16733	7.85559	0.186295	8.29881	0.170978			65	-0.625688	0.0463528	-0.430602	0.0765999	-0.172801	0.0553431	-0.155755	0.0542619	-0.441299	0.0791575	-0.275136	0.0242431
66	7.57825	0.0992343	7.70168	0.138233	8.13057	0.169439	8.2739	0.167767	7.85217	0.185898	8.29402	0.170448			66	-0.638064	0.046435	-0.439885	0.0770574	-0.178269	0.0570091	-0.160131	0.0553767	-0.444722	0.0786625	-0.279923	0.0239807
67	7.56738	0.0989469	7.69318	0.138749	8.12679	0.170078	8.26901	0.168259	7.85284	0.184491	8.29114	0.170285			67	-0.648928	0.0468133	-0.448386	0.0777912	-0.182056	0.0579886	-0.165014	0.0563221	-0.44405	0.0777406	-0.282803	0.0248485
68	7.55602	0.0984997	7.68494	0.139166	8.12249	0.171079	8.26474	0.168874	7.85315	0.183409	8.28858	0.170231			68	-0.660297	0.0475434	-0.456626	0.0784966	-0.186352	0.0592725	-0.169284	0.0578413	-0.443736	0.0772725	-0.285361	0.0261859
69	7.54497	0.0983012	7.6761	0.139382	8.11765	0.172019	8.25823	0.169864	7.85	0.183276	8.28631	0.170939			69	-0.671345	0.0481082	-0.46546	0.0790908	-0.191193	0.0602547	-0.175794	0.0593432	-0.446886	0.0768273	-0.287629	0.0276589
70	7.53457	0.0983499	7.66846	0.139292	8.11257	0.172921	8.25219	0.171388	7.8471	0.183306	8.28307	0.170853			70	-0.681746	0.0484584	-0.473101	0.0788353	-0.196274	0.0609712	-0.181838	0.0597729	-0.449796	0.0768918	-0.290873	0.0285185
71	7.52444	0.097282	7.6582	0.138393	8.10752	0.173718	8.24545	0.172713	7.84238	0.183143	8.27847	0.170408			71	-0.69187	0.0483667	-0.483359	0.078209	-0.20132	0.0616156	-0.188578	0.0601574	-0.454507	0.0767961	-0.295475	0.0289076
72	7.51563	0.0955092	7.64988	0.138608	8.10117	0.175158	8.23979	0.174043	7.84426	0.181866	8.2775	0.170239			72	-0.700685	0.0494733	-0.491682	0.078892	-0.207667	0.0627255	-0.194234	0.0609189	-0.452634	0.077718	-0.296438	0.0281237
73	7.50585	0.0943042	7.64	0.138807	8.09481	0.176675	8.23422	0.174669	7.84085	0.182444	8.27206	0.170087			73	-0.71046	0.0494236	-0.501563	0.0791542	-0.214028	0.0639691	-0.199811	0.0622118	-0.456037	0.0779819	-0.301883	0.0270025
74	7.4968	0.0932986	7.62962	0.139343	8.08941	0.177104	8.22775	0.174748	7.83467	0.18418	8.26739	0.170349			74	-0.719508	0.04911	-0.511938	0.0797705	-0.219428	0.0644725	-0.206283	0.0633671	-0.462223	0.0795576	-0.306555	0.0268908
75	7.48888	0.0929861	7.6202	0.139576	8.0835	0.178424	8.22055	0.175572	7.82934	0.184579	8.26282	0.169901			75	-0.727435	0.04985	-0.521365	0.0802471	-0.225345	0.0661955	-0.213481	0.0649056	-0.467546	0.0804691	-0.31112	0.0270524
76	7.4821	0.0929741	7.61363	0.139752	8.07873	0.17885	8.21458	0.176288	7.82699	0.183205	8.26245	0.169242			76	-0.734211	0.0509519	-0.52793	0.0813133	-0.230114	0.0668598	-0.21945	0.0661527	-0.469905	0.0810877	-0.311488	0.0283474
77	7.47464	0.0913989	7.61017	0.140213	8.07472	0.178931	8.20932	0.177258	7.8294	0.181546	8.26052	0.168827			77	-0.741673	0.0514796	-0.531391	0.0825296	-0.234117	0.0673959	-0.224711	0.0679577	-0.467494	0.0814724	-0.313427	0.0282766
78	7.47082	0.0909658	7.60962	0.1414	8.07477	0.17945	8.20748	0.178329	7.83277	0.182358	8.26174	0.17058			78	-0.745488	0.0521553	-0.531946	0.0847989	-0.234072	0.0689473	-0.226544	0.0698259	-0.464126	0.0825616	-0.312204	0.0279907
79	7.46907	0.089953	7.61158	0.142956	8.07666	0.17934	8.20352	0.180157	7.83812	0.183518	8.26713	0.171956			79	-0.747246	0.0534204	-0.529984	0.0880054	-0.232181	0.0698936	-0.230507	0.0715878	-0.458771	0.08427	-0.306815	0.0282769
80	7.46762	0.0894039	7.61583	0.144896	8.07611	0.179593	8.197	0.181631	7.84372	0.183994	8.27057	0.173289			80	-0.748692	0.0555554	-0.525737	0.0916261	-0.232728	0.0709377	-0.237024	0.0740423	-0.453173	0.0862314	-0.303376	0.0282693
81	7.46392	0.0883123	7.61805	0.147011	8.07464	0.18031	8.18883	0.182761	7.84563	0.183508	8.27003	0.174307			81	-0.752388	0.0568492	-0.523515	0.0947172	-0.234206	0.072153	-0.245203	0.0768456	-0.451265	0.0879132	-0.303908	0.0280315
82	7.45964	0.0879362	7.61543	0.148713	8.07033	0.180657	8.18469	0.183183	7.84628	0.183313	8.27024	0.175152			82	-0.756674	0.058314	-0.52613	0.0970554	-0.238509	0.0728279	-0.249339	0.0772436	-0.450615	0.0893964	-0.303701	0.0286684
83	7.45394	0.0872265	7.61043	0.149511	8.06641	0.181155	8.17822	0.184021	7.84583	0.183528	8.26919	0.175827			83	-0.762375	0.0595543	-0.531131	0.098698	-0.242432	0.0736662	-0.255805	0.0788498	-0.451061	0.0906186	-0.304752	0.0287645
84	7.44615	0.0856171	7.60526	0.150548	8.06144	0.181634	8.17271	0.184546	7.84419	0.183308	8.26819	0.176686			84	-0.77016	0.0608223	-0.536302	0.100214	-0.247402	0.0741487	-0.261319	0.0798619	-0.452706	0.0914883	-0.305751	0.0296046
85	7.43608	0.0848907	7.59607	0.150017	8.05582	0.182006	8.16732	0.185067	7.83589	0.181327	8.26922	0.176492			85	-0.780229	0.0620613	-0.545495	0.0999083	-0.253024	0.0745726	-0.266708	0.0806367	-0.461	0.0916745	-0.30472	0.0330494
86	7.42265	0.0844231	7.58481	0.149186	8.04882	0.18257	8.16133	0.185817	7.82462	0.179907	8.26416	0.175504			86	-0.793666	0.0621973	-0.556755	0.0985647	-0.260023	0.0747429	-0.272698	0.0822384	-0.472275	0.0907898	-0.309785	0.0354828
87	7.40856	0.0841355	7.57088	0.14852	8.0405	0.183789	8.15557	0.186219	7.8134	0.179801	8.25492	0.175364			87	-0.807751	0.061566	-0.57068	0.096775	-0.268338	0.0752461	-0.278455	0.0839778	-0.483494	0.0900219	-0.319021	0.0368589
88	7.39419	0.0849973	7.55666	0.149434	8.03027	0.186126	8.15088	0.18633	7.80237	0.180454	8.24839	0.17577			88	-0.822126	0.0612573	-0.584905	0.0970644	-0.278572	0.0773468	-0.283144	0.0836271	-0.494518	0.0897756	-0.325552	0.0377414
89	7.38218	0.0864167	7.54475	0.150397	8.02264	0.187612	8.14518	0.186539	7.79496	0.181016	8.24131	0.17614			89	-0.834134	0.0614087	-0.596814	0.0976809	-0.286198	0.0788124	-0.288847	0.0835569	-0.501928	0.0892852	-0.332631	0.0382822
90	7.37146	0.0871729	7.53554	0.151287	8.01559	0.188653	8.13857	0.187331	7.79004	0.181382	8.23584	0.176592			90	-0.844856	0.0620617	-0.606025	0.0982455	-0.293249	0.0797789	-0.295456	0.0845112	-0.506852	0.0888101	-0.338099	0.0384439
91	7.36188	0.0880766	7.52556	0.152314	8.00869	0.189666	8.13271	0.18754	7.78683	0.181169	8.23104	0.176495			91	-0.85443	0.0626871	-0.616	0.0991997	-0.300156	0.0805791	-0.301322	0.0849668	-0.510064	0.0881656	-0.342904	0.037807
92	7.35144	0.088193	7.51851	0.15232	8.00172	0.190257	8.12771	0.187351	7.78363	0.180712	8.22671	0.176585			92	-0.86487	0.062788	-0.623054	0.09859	-0.307119	0.0808339	-0.306315	0.0844993	-0.513261	0.0871948	-0.347236	0.0378492
93	7.34047	0.0881019	7.51611	0.150668	7.99455	0.19049	8.12304	0.18699	7.77804	0.180923	8.22157	0.176416			93	-0.875843	0.0621304	-0.625448	0.0964223	-0.314286	0.0806177	-0.310989	0.0838429	-0.518853	0.0869439	-0.35237	0.0384683
94	7.33002	0.0885171	7.51089	0.150901	7.98739	0.191479	8.11965	0.187152	7.77431	0.181119	8.21575	0.175484			94	-0.886295	0.0625488	-0.63067	0.0969845	-0.321449	0.0816364	-0.314382	0.0849144	-0.522584	0.0871881	-0.358194	0.0384263
95	7.32006	0.0884837	7.50334	0.151963	7.98002	0.192533	8.11309	0.187604	7.77122	0.180942	8.21079	0.175555			95	-0.896252	0.0623876	-0.638219	0.0987793	-0.328821	0.0825238	-0.320942	0.0859331	-0.52567	0.0870954	-0.363152	0.0391827
96	7.30993	0.0886969	7.4968	0.152341	7.97384	0.193164	8.1051	0.188648	7.7627	0.182638	8.20539	0.175875			96	-0.906387	0.0622841	-0.64476	0.0990118	-0.335003	0.0830555	-0.328929	0.0883977	-0.534193	0.0881667	-0.368549	0.0390703
97	7.29879	0.0890619	7.48905	0.153854	7.96713	0.193851	8.09967	0.188017	7.75347	0.184797	8.20036	0.176011			97	-0.917518	0.062622	-0.652511	0.100543	-0.341714	0.0838483	-0.334355	0.0879525	-0.543423	0.0890297	-0.373582	0.0391702
98	7.29066	0.0895963	7.48064	0.155449	7.96041	0.193916	8.092	0.187851	7.7468	0.186318	8.19794	0.17658			98	-0.925649	0.0626404	-0.660919	0.102244	-0.348433	0.0840776	-0.34203	0.0889305	-0.550092	0.0899739	-0.376003	0.0396511
99	7.28402	0.0897438	7.47515	0.156491	7.95607	0.193495	8.08505	0.188088	7.74189	0.187339	8.19619	0.17715			99	-0.932294	0.0622818	-0.666409	0.103029	-0.352767	0.0838955	-0.348981	0.0903616	-0.555001	0.090786	-0.377753	0.0400245
100	7.27807	0.0915856	7.46885	0.157292	7.95231	0.19329	8.08137	0.187542	7.73684	0.188236	8.19278	0.177498			100	-0.93824	0.0618867	-0.672714	0.103353	-0.356536	0.0838544	-0.352664	0.0896663	-0.560052	0.091468	-0.381166	0.0397067
101	7.27187	0.0928178	7.46333	0.159219	7.94714	0.192563	8.07485	0.186867	7.7345	0.190259	8.18956	0.179361			101	-0.944447	0.0618422	-0.678232	0.104948	-0.3617	0.0832055	-0.359178	0.0893635	-0.562394	0.0923305	-0.384379	0.0381796
102	7.26642	0.0938248	7.4581	0.161155	7.94225	0.191532	8.06724	0.186532	7.73655	0.19106	8.18726	0.180505			102	-0.949892	0.0626661	-0.68346	0.107458	-0.366587	0.0825748	-0.366785	0.0892458	-0.560338	0.0930812	-0.386683	0.0371405
103	7.26491	0.0933847	7.4538	0.163098	7.94341	0.190444	8.06291	0.186372	7.74156	0.190728	8.19096	0.18223			103	-0.951398	0.0643146	-0.687764	0.110267	-0.365433	0.082509	-0.371123	0.0888021	-0.555331	0.0947627	-0.382977	0.0384868
104	7.26322	0.0930308	7.44867	0.164067	7.94458	0.189278	8.05872	0.186687	7.74662	0.18987	8.19129	0.18253			104	-0.953097	0.0660322	-0.692893	0.112173	-0.364257	0.082325	-0.375312	0.0896883	-0.550274	0.0959318	-0.382651	0.0380137
105	7.26074	0.0919234	7.4435	0.164366	7.94367	0.188152	8.05592	0.185746	7.75094	0.188668	8.19138	0.182881			105	-0.955575	0.0665754	-0.698067	0.113092	-0.365171	0.0818074	-0.378109	0.0879769	-0.545946	0.0962329	-0.382563	0.0379897
106	7.25687	0.0908724	7.439	0.164379	7.94242	0.186662	8.0519	0.185166	7.75286	0.187912	8.18962	0.183279			106	-0.959438	0.0666994	-0.702564	0.113058	-0.366417	0.080568	-0.382124	0.086717	-0.544034	0.0966833	-0.384321	0.0381599
107	7.25013	0.0896078	7.43393	0.163575	7.9395	0.185689	8.04683	0.184975	7.75312	0.187421	8.18697	0.18318			107	-0.966185	0.0668948	-0.707634	0.112339	-0.369341	0.0798718	-0.387203	0.0860591	-0.543768	0.0971182	-0.386968	0.0379179
108	7.24168	0.0873936	7.42713	0.162552	7.93524	0.184547	8.04162	0.184618	7.75216	0.18708	8.18421	0.182952			108	-0.974637	0.067094	-0.714435	0.111705	-0.373604	0.0788361	-0.392409	0.0855662	-0.544726	0.097484	-0.389728	0.0377234
109	7.23058	0.0865867	7.41558	0.161453	7.92933	0.183692	8.03563	0.184734	7.74356	0.185361	8.17441	0.180851			109	-0.985736	0.0675678	-0.725987	0.11067	-0.379516	0.0779712	-0.398394	0.0856574	-0.553335	0.097992	-0.399531	0.0387709
110	7.21441	0.0863663	7.40155	0.160311	7.91947	0.183829	8.02964	0.184745	7.732	0.184196	8.16388	0.177729			110	-1.0019	0.0675807	-0.740012	0.109365	-0.389369	0.0776304	-0.404387	0.0862542	-0.564887	0.0979487	-0.410061	0.040466
111	7.19721	0.0869596	7.38925	0.160066	7.90922	0.185124	8.02285	0.18437	7.72054	0.184745	8.15621	0.175315			111	-1.0191	0.0663188	-0.752311	0.109088	-0.399624	0.0777052	-0.41118	0.087067	-0.576348	0.0969236	-0.417735	0.0410799
112	7.18196	0.0873908	7.37712	0.162193	7.89954	0.186177	8.01356	0.184596	7.71098	0.185566	8.14994	0.17507			112	-1.03436	0.0649634	-0.76444	0.111158	-0.409299	0.0785075	-0.42047	0.0884035	-0.585908	0.0961989	-0.424005	0.0418025
113	7.16825	0.0890205	7.36222	0.165349	7.8907	0.187204	8.00186	0.185222	7.70379	0.1866	8.14632	0.175004			113	-1.04807	0.0651373	-0.77934	0.114796	-0.418136	0.0802026	-0.432166	0.0912194	-0.593103	0.0954726	-0.427621	0.042361
114	7.15547	0.0903164	7.3488	0.168171	7.88251	0.187849	7.99308	0.186737	7.69757	0.18741	8.14049	0.174637			114	-1.06084	0.065714	-0.792759	0.117929	-0.426333	0.0812772	-0.440951	0.0938786	-0.599323	0.095219	-0.43345	0.0417159
115	7.14331	0.0910186	7.35201	0.159252	7.87545	0.188943	7.98335	0.188191	7.69073	0.187487	8.13496	0.174202			115	-1.073	0.0661716	-0.789553	0.106599	-0.433388	0.082707	-0.45068	0.0962341	-0.606161	0.0951897	-0.438978	0.0406358
116	7.13264	0.091672	7.33951	0.160611	7.86865	0.189333	7.97489	0.189473	7.68586	0.187828	8.12933	0.173359			116	-1.08367	0.0671195	-0.802057	0.108757	-0.440189	0.0835835	-0.459137	0.0985197	-0.611028	0.0951642	-0.444609	0.0403262
117	7.12137	0.0918629	7.32607	0.161365	7.86309	0.189674	7.96705	0.190716	7.68074	0.187669	8.12302	0.172003			117	-1.09494	0.0678798	-0.815492	0.110267	-0.445751	0.0842356	-0.466983	0.100466	-0.616152	0.0950574	-0.450918	0.0396783
118	7.11106	0.0920978	7.31225	0.162734	7.85712	0.189815	7.9584	0.1914	7.68238	0.18538	8.11682	0.170823			118	-1.10526	0.0683006	-0.829309	0.112216	-0.451717	0.0847551	-0.475631	0.101872	-0.614507	0.093296	-0.457121	0.0390927
119	7.1001	0.0918782	7.29838	0.163699	7.84988	0.189536	7.95011	0.191959	7.69852	0.180935	8.10943	0.170528			119	-1.11621	0.0686796	-0.843186	0.113917	-0.458966	0.085017	-0.483922	0.10352	-0.598372	0.091081	-0.464507	0.0383311
120	7.09035	0.092248	7.2852	0.165062	7.84303	0.189822	7.94205	0.193181	7.69698	0.180172	8.10477	0.169794			120	-1.12596	0.0692932	-0.856359	0.115741	-0.465807	0.0855343	-0.491982	0.105169	-0.599911	0.0912162	-0.469171	0.0380857
121	7.07969	0.0925804	7.27244	0.166586	7.8367	0.189983	7.93305	0.194075	7.69391	0.180485	8.10003	0.169782			121	-1.13663	0.0694256	-0.869126	0.117519	-0.472138	0.0858834	-0.500977	0.106659	-0.602984	0.0916085	-0.473908	0.0374731
122	7.06941	0.0930872	7.26013	0.168687	7.82982	0.189635	7.92477	0.195189	7.69112	0.180972	8.09574	0.16984			122	-1.1469	0.069835	-0.88143	0.119678	-0.479023	0.0861377	-0.509256	0.108264	-0.60577	0.0919629	-0.478202	0.0372079
123	7.06087	0.0939249	7.24913	0.170243	7.82397	0.189605	7.91766	0.197104	7.68849	0.180853	8.09174	0.169484			123	-1.15544	0.0703826	-0.892433	0.121521	-0.484872	0.0866488	-0.516371	0.110395	-0.608405	0.0924285	-0.482197	0.0376488
124	7.05367	0.0961074	7.23904	0.172331	7.81799	0.189566	7.90936	0.198947	7.6867	0.181318	8.09075	0.169877			124	-1.16264	0.0711268	-0.902522	0.123728	-0.490848	0.0869789	-0.524673	0.112533	-0.610186	0.0929427	-0.483196	0.0386664
125	7.04486	0.0974	7.2297	0.17522	7.80882	0.188403	7.90309	0.200972	7.68666	0.18293	8.08958	0.171778			125	-1.17145	0.0717141	-0.911859	0.126325	-0.500026	0.0862798	-0.530939	0.11524	-0.610235	0.093528	-0.48436	0.0401759
126	7.03864	0.0986952	7.2182	0.178759	7.80496	0.187947	7.89731	0.203467	7.68796	0.18398	8.08591	0.173194			126	-1.17768	0.0724373	-0.923358	0.13009	-0.503878	0.0866922	-0.536723	0.117262	-0.608931	0.0950584	-0.488029	0.0393915
127	7.03576	0.0987971	7.20473	0.181934	7.80566	0.187591	7.89149	0.204936	7.69147	0.184295	8.08429	0.174384			127	-1.18055	0.0740749	-0.936835	0.133801	-0.503184	0.0880253	-0.542535	0.119352	-0.605418	0.097173	-0.48965	0.0385408
128	7.03131	0.098826	7.19434	0.184637	7.80306	0.187127	7.88112	0.206793	7.69582	0.18412	8.08412	0.175291			128	-1.185	0.0759308	-0.947226	0.137171	-0.505782	0.089084	-0.552912	0.121858	-0.601076	0.0984555	-0.489819	0.0375809
129	7.02703	0.0982075	7.18439	0.185968	7.7992	0.186179	7.87558	0.20595	7.6981	0.183518	8.08326	0.175224			129	-1.18929	0.0764864	-0.957169	0.139019	-0.50964	0.0886834	-0.558448	0.120224	-0.598793	0.0991481	-0.490677	0.0362912
130	7.0209	0.0974034	7.17541	0.186192	7.79567	0.185395	7.86925	0.205935	7.69854	0.183359	8.08021	0.175684			130	-1.19541	0.0762657	-0.96615	0.139486	-0.513172	0.0881628	-0.564782	0.119579	-0.598355	0.0996561	-0.493728	0.0356407
131	7.01289	0.0965216	7.1636	0.187064	7.79123	0.184729	7.86157	0.20655	7.69834	0.183246	8.07709	0.175662			131	-1.20342	0.0763145	-0.97796	0.140685	-0.517611	0.0876088	-0.572463	0.120025	-0.598546	0.100327	-0.496854	0.0348366
132	7.00318	0.0951266	7.15168	0.187141	7.78642	0.184403	7.85303	0.207229	7.69562	0.182463	8.07312	0.17541			132	-1.21313	0.0765962	-0.989887	0.141193	-0.522419	0.0874963	-0.581002	0.120409	-0.601269	0.100787	-0.500821	0.0343579
133	6.99003	0.0942767	7.13363	0.186561	7.77858	0.184244	7.8412	0.20792	7.68946	0.180267	8.06547	0.173461			133	-1.22628	0.0768919	-1.00793	0.141117	-0.530259	0.0870433	-0.592828	0.120984	-0.607428	0.10107	-0.508471	0.034354
134	6.97331	0.0941282	7.11367	0.186279	7.7702	0.184877	7.83062	0.20807	7.67989	0.178277	8.05614	0.170787			134	-1.243	0.0765819	-1.02789	0.140668	-0.538641	0.0870476	-0.603407	0.121801	-0.617004	0.100774	-0.5178	0.03717
135	6.95457	0.0944079	7.09771	0.186918	7.76014	0.185463	7.82311	0.207802	7.668	0.178173	8.04604	0.167853			135	-1.26174	0.075573	-1.04385	0.14131	-0.548697	0.0868165	-0.610916	0.123544	-0.628889	0.0996774	-0.5279	0.0382257
136	6.93763	0.0952633	7.08228	0.189507	7.74706	0.186683	7.81048	0.209456	7.65806	0.179084	8.04077	0.167297			136	-1.27868	0.0746676	-1.05928	0.144222	-0.561784	0.0871566	-0.623548	0.12636	-0.638826	0.0991922	-0.533176	0.0397319
137	6.92072	0.0969599	7.09807	0.166438	7.73425	0.187865	7.79455	0.212415	7.64947	0.179931	8.03282	0.165947			137	-1.2956	0.0754302	-1.0435	0.116385	-0.574589	0.0885939	-0.639476	0.130612	-0.647422	0.098777	-0.54112	0.0403799
138	6.9036	0.0976976	7.07518	0.163749	7.71794	0.188656	7.78177	0.215386	7.64041	0.180182	8.01928	0.163857			138	-1.31271	0.0760564	-1.06639	0.114327	-0.590897	0.0891887	-0.652263	0.134883	-0.656478	0.0977043	-0.554662	0.0381182
139	6.88971	0.0990368	7.05338	0.162593	7.70616	0.189746	7.77096	0.218758	7.63261	0.180554	8.00876	0.162328			139	-1.3266	0.0767148	-1.08819	0.113763	-0.602676	0.0901357	-0.663068	0.139162	-0.664279	0.0966137	-0.565178	0.0371154
140	6.87659	0.100585	7.03655	0.161537	7.69938	0.192797	7.75824	0.221799	7.62893	0.181859	8.00281	0.161666			140	-1.33973	0.0770389	-1.10501	0.112694	-0.609461	0.0927366	-0.675793	0.14266	-0.667962	0.0967478	-0.571136	0.0373561
141	6.86373	0.101764	7.01988	0.162903	7.69144	0.193351	7.74593	0.224374	7.6245	0.183419	7.99765	0.161358			141	-1.35258	0.0768532	-1.12168	0.114156	-0.617398	0.0934103	-0.688104	0.146128	-0.672389	0.0966261	-0.576291	0.0375528
142	6.84877	0.103179	7.00441	0.161591	7.68496	0.195461	7.7304	0.225744	7.61692	0.184918	7.98906	0.161046			142	-1.36754	0.0765721	-1.13715	0.111941	-0.623877	0.0953605	-0.70363	0.147997	-0.679972	0.0951388	-0.584885	0.0364908
143	6.8343	0.104363	6.98834	0.161477	7.67519	0.1961	7.71811	0.22724	7.6099	0.185979	7.98041	0.160643			143	-1.38201	0.0763888	-1.15322	0.111736	-0.633651	0.096137	-0.715922	0.150903	-0.686987	0.0940454	-0.593528	0.0361323
144	6.8202	0.103672	6.9709	0.161371	7.66268	0.195782	7.70135	0.229398	7.60448	0.185024	7.97365	0.158567			144	-1.39611	0.0764951	-1.17066	0.112298	-0.646164	0.0961531	-0.73268	0.152828	-0.692409	0.0947427	-0.600291	0.0369844
145	6.8098	0.104356	6.95459	0.162431	7.65368	0.19613	7.68774	0.230612	7.6034	0.185405	7.96993	0.158245			145	-1.40652	0.0772474	-1.18697	0.11359	-0.655157	0.0969616	-0.746287	0.155023	-0.693493	0.0960189	-0.604015	0.0380482
146	6.80005	0.105922	6.94663	0.159756	7.64737	0.196658	7.67644	0.231986	7.60281	0.185998	7.96711	0.158651			146	-1.41627	0.0784895	-1.19493	0.110161	-0.661472	0.0977457	-0.757587	0.157908	-0.694078	0.097114	-0.606836	0.0389354
147	6.78826	0.107682	6.9254	0.162937	7.63649	0.197785	7.66455	0.232809	7.59891	0.187356	7.96158	0.159223			147	-1.42805	0.0796452	-1.21616	0.113835	-0.672354	0.0989009	-0.769477	0.160302	-0.697977	0.0980206	-0.612365	0.0391681
148	6.77642	0.110434	6.91049	0.163067	7.62363	0.198234	7.65517	0.233472	7.59693	0.18942	7.95817	0.160836			148	-1.4399	0.0812982	-1.23107	0.114093	-0.685214	0.0998934	-0.77886	0.160977	-0.699956	0.0989009	-0.615772	0.040369
149	6.76485	0.113323	6.89872	0.165015	7.6094	0.198597	7.64277	0.236046	7.59499	0.192033	7.9552	0.163816			149	-1.45146	0.0824898	-1.24284	0.115452	-0.699444	0.100556	-0.791262	0.163958	-0.701903	0.0998566	-0.618743	0.0406234
150	6.75328	0.115621	6.89133	0.167486	7.59949	0.200071	7.6285	0.239358	7.5943	0.194055	7.95383	0.167075			150	-1.46303	0.0833562	-1.25024	0.117395	-0.709351	0.102234	-0.805527	0.167627	-0.702586	0.100897	-0.620107	0.0411784
151	6.74419	0.116773	6.88202	0.169845	7.59813	0.20088	7.62129	0.24113	7.59481	0.195613	7.95238	0.169138			151	-1.47212	0.08391	-1.25954	0.119667	-0.71071	0.104517	-0.812737	0.171255	-0.702077	0.101	-0.621562	0.042066
152	6.73629	0.11724	6.87049	0.171617	7.5924	0.201955	7.60727	0.244929	7.59601	0.196668	7.95168	0.170962			152	-1.48002	0.084247	-1.27108	0.121787	-0.716441	0.106706	-0.826756	0.176151	-0.700877	0.100936	-0.622259	0.041957
153	6.72657	0.116977	6.85621	0.174058	7.58472	0.202372	7.59501	0.24568	7.59586	0.197233	7.9493	0.171326			153	-1.48974	0.0837031	-1.28535	0.12479	-0.724126	0.107749	-0.839021	0.176152	-0.70103	0.100284	-0.624638	0.0413345
154	6.71684	0.116652	6.84093	0.175103	7.57617	0.201998	7.58326	0.246274	7.59415	0.197241	7.9459	0.171732			154	-1.49947	0.0831801	-1.30063	0.126254	-0.732668	0.107895	-0.850772	0.176459	-0.702739	0.100073	-0.628038	0.0414163
155	6.70618	0.116764	6.82566	0.17648	7.56914	0.201607	7.56844	0.248348	7.59227	0.197782	7.94162	0.171845			155	-1.51013	0.0829988	-1.31591	0.127991	-0.739705	0.108047	-0.865588	0.178215	-0.704618	0.100149	-0.632318	0.0417693
156	6.69424	0.116096	6.80996	0.176501	7.55954	0.201656	7.55705	0.249622	7.58922	0.197302	7.93653	0.170855			156	-1.52207	0.0832396	-1.3316	0.128404	-0.749306	0.108546	-0.876977	0.179889	-0.707671	0.100224	-0.637411	0.0415857
157	6.6783	0.115312	6.78544	0.175817	7.54686	0.202343	7.54114	0.251048	7.58009	0.194913	7.92563	0.167698			157	-1.53801	0.0836354	-1.35612	0.128196	-0.761976	0.10956	-0.892894	0.182016	-0.716799	0.0999048	-0.64831	0.0423016
158	6.65976	0.114932	6.7573	0.172092	7.52818	0.202564	7.52645	0.252663	7.56941	0.193314	7.91043	0.164488			158	-1.55655	0.0834518	-1.38426	0.125575	-0.780662	0.109826	-0.907577	0.184878	-0.727485	0.0991217	-0.663516	0.0458341
159	6.63982	0.115065	6.73281	0.170258	7.51107	0.203196	7.51109	0.254963	7.55852	0.192802	7.89723	0.161531			159	-1.5765	0.0835488	-1.40875	0.125086	-0.797767	0.109565	-0.922942	0.188	-0.738371	0.0989863	-0.676707	0.0482059
160	6.6207	0.115633	6.70939	0.169904	7.50351	0.207807	7.49248	0.260614	7.54714	0.191249	7.88727	0.158962			160	-1.59562	0.0847485	-1.43218	0.125675	-0.805331	0.11337	-0.941553	0.193882	-0.74975	0.0999301	-0.686671	0.0489949
161	6.60217	0.116572	6.68601	0.16752	7.48862	0.206744	7.46873	0.264021	7.5373	0.189335	7.87887	0.156527			161	-1.61415	0.0874402	-1.45556	0.124928	-0.820221	0.113085	-0.965297	0.197941	-0.759589	0.100731	-0.69507	0.0494898
162	6.58642	0.117977	6.66909	0.164934	7.47359	0.207648	7.44811	0.268911	7.53041	0.187866	7.87294	0.154762			162	-1.62989	0.089852	-1.47247	0.123553	-0.835252	0.114558	-0.985923	0.203005	-0.766484	0.102294	-0.700998	0.0512916
163	6.57108	0.119194	6.65196	0.163729	7.4575	0.209719	7.42516	0.274595	7.52435	0.186917	7.86792	0.153178			163	-1.64523	0.0925321	-1.4896	0.12339	-0.851338	0.116998	-1.00887	0.208858	-0.772537	0.104827	-0.706024	0.0531037
164	6.55595	0.120604	6.64036	0.16554	7.44963	0.211123	7.40503	0.281714	7.52126	0.18706	7.86766	0.153211			164	-1.66036	0.0950345	-1.5012	0.126458	-0.859208	0.119422	-1.02899	0.217381	-0.775629	0.107109	-0.70628	0.0514496
165	6.54182	0.121982	6.62894	0.166934	7.43843	0.212673	7.38998	0.287511	7.51979	0.187988	7.86797	0.15356			165	-1.6745	0.0966947	-1.51263	0.129174	-0.87041	0.121661	-1.04405	0.225374	-0.777102	0.108537	-0.705969	0.0495589
166	6.52953	0.123234	6.61674	0.166669	7.42247	0.214674	7.36825	0.294544	7.51861	0.188596	7.86624	0.154171			166	-1.68678	0.0976475	-1.52482	0.130341	-0.886371	0.123849	-1.06578	0.233234	-0.778281	0.109735	-0.707698	0.0493835
167	6.5165	0.124777	6.6067	0.168222	7.4145	0.216295	7.35014	0.303641	7.51532	0.18897	7.86408	0.154627			167	-1.69981	0.0991938	-1.53487	0.131937	-0.894339	0.125729	-1.08388	0.243676	-0.781569	0.111118	-0.709862	0.0497258
168	6.50411	0.126628	6.5972	0.168984	7.40285	0.219066	7.32032	0.319706	7.51072	0.189844	7.86107	0.154405			168	-1.7122	0.10117	-1.54437	0.132761	-0.905991	0.128678	-1.11371	0.262664	-0.78617	0.113423	-0.712872	0.0504565

## Sheet: 3.Total amount of C mineralized
Figure 4. Total amount of C mineralized (mg C per mg C) during the 168h’ incubations with and without AMO under rotation rotating and standing stationary conditions with (a) soil from arable land (b) forest soils.
	SOC+AMO_rotation	SE_1	SOC+AMO_stationary	SE_2	SOC-AMO_rotation	SE_3	SOC-AMO_stationary	SE_4
arable land soil	0.0628	0.00743795	0.0554	0.00516492	0.0275	0.00326276	0.029	0.00299299
forest soil	0.0475	0.00280533	0.0428	0.00368132	0.0218	0.00314509	0.0198	0.0013991

## Sheet: 4.air dried vs oven dried soil
Figure 5. Cumulative amount of C mineralized (mg C per mg C) during incubation with soil under two drying methods: a) oven dried soil; b) and air dried soil, with addition of AMO and without addition of AMO.
Time (h)	air dried soil+AMO	SE_1	air dried soil-AMO	SE_2	oven dried soil+AMO	SE_3	oven dried soil-AMO	SE_4
1	0	0	0	0	0	0	0	0
2	-0.000681316	0.000426568	0.000237913	0.000218461	7.25735e-05	7.00489e-05	-0.000101973	0.000198818
3	-0.000610567	0.000338024	0.00052316	0.000308527	6.07771e-05	7.12652e-05	-0.000101497	0.0003017
4	-0.000540914	0.000207808	0.000550285	0.000584598	-2.25216e-05	7.34405e-06	-0.000119705	0.000298347
5	-0.000486079	0.000346314	0.000574524	0.000799652	-0.000179668	8.8306e-05	-0.000154701	0.000249931
6	-0.000778399	0.000416454	8.43474e-05	0.000522832	-0.000328842	0.000119378	0.000553566	0.000555378
7	-0.00111054	0.000539467	0.000341488	0.000534023	-0.000483061	0.000123218	0.000645203	0.00057153
8	-0.000967689	0.000327637	6.01788e-05	0.000541102	-0.000867	4.74493e-05	0.000415921	0.000417588
9	-0.0011704	0.000178172	-0.000142545	0.00061519	-0.00143567	8.28425e-05	0.000255477	0.000286392
10	-0.00155899	0.000143641	-0.000200398	0.000509392	-0.0017791	0.000130927	0.000184097	0.000278841
11	-0.00180714	0.000137598	-0.000276912	0.000504441	-0.00212117	0.000190037	0.000150864	0.000286028
12	-0.00201166	0.00014004	-0.000368398	0.000500862	-0.00248622	0.000189071	2.53847e-05	0.000278555
13	-0.00225359	0.000211826	-0.000484074	0.000484481	-0.00275893	0.000147209	-7.4954e-05	0.000297882
14	-0.00274211	0.000216933	-0.000622813	0.000494828	-0.00309087	0.000202615	-0.00023175	0.000294744
15	-0.00299341	0.000243395	-0.000593684	0.000502365	-0.00384991	0.000416018	-8.45694e-05	0.000463827
16	-0.00334951	0.000262778	-0.000740736	0.000491459	-0.00454244	0.000607104	-0.000359815	0.000435058
17	-0.00365871	0.000274436	-0.000934355	0.00051721	-0.0050101	0.000701577	-0.000670633	0.00042383
18	-0.00403963	0.00028132	-0.00109808	0.000500346	-0.00529893	0.000580194	-0.00100352	0.000431594
19	-0.00430541	0.000364287	-0.00122644	0.000475404	-0.00565203	0.000613641	-0.00117513	0.000506609
20	-0.00474669	0.000363455	-0.00139743	0.000421123	-0.00599944	0.000643307	-0.00131792	0.000646965
21	-0.00547932	0.000494537	-0.00158362	0.000367986	-0.00632867	0.000636898	-0.00151284	0.00072554
22	-0.0060927	0.000610485	-0.00194421	0.000420911	-0.00664981	0.000629811	-0.00182468	0.000703641
23	-0.00696178	0.000855154	-0.00221012	0.000405815	-0.0072513	0.000887606	-0.00209404	0.000732246
24	-0.00756511	0.00104982	-0.00239813	0.000365049	-0.00780407	0.000979549	-0.00235991	0.000678373
25	-0.00772005	0.00092944	-0.00254891	0.000327233	-0.00830582	0.000945838	-0.0026917	0.000667297
26	-0.00756475	0.000703239	-0.0027322	0.000279877	-0.00868931	0.000921317	-0.00295236	0.00064744
27	-0.00885999	0.00116353	-0.00292271	0.000261593	-0.00897631	0.000826584	-0.00325802	0.000655827
28	-0.00920901	0.00107178	-0.00327581	0.000239519	-0.0094166	0.000749604	-0.00353068	0.000608966
29	-0.00897704	0.00052422	-0.0038826	0.000343369	-0.00980838	0.000667048	-0.00388488	0.000587334
30	-0.00902774	0.000527318	-0.00472179	0.000654452	-0.0103292	0.000629686	-0.00420647	0.000574799
31	-0.00917229	0.000484469	-0.00566503	0.00113624	-0.0112074	0.000832293	-0.00451056	0.000565485
32	-0.00911222	0.000544662	-0.00605499	0.00115687	-0.0123491	0.00133506	-0.00481241	0.000564148
33	-0.00933579	0.000567383	-0.00604508	0.000953105	-0.0126367	0.00127305	-0.00512433	0.000545036
34	-0.00976388	0.00046108	-0.00608516	0.000852881	-0.012893	0.00116526	-0.00538975	0.000527133
35	-0.0100335	0.000410818	-0.00653828	0.000966749	-0.0132888	0.00116984	-0.00568798	0.000548294
36	-0.0102707	0.000410269	-0.00683653	0.00104123	-0.0134521	0.00100081	-0.00596911	0.000535662
37	-0.0106269	0.000460766	-0.00730812	0.00131244	-0.013047	0.000459479	-0.00625642	0.000506521
38	-0.0109843	0.000509383	-0.00667188	0.000799957	-0.0129647	0.000272617	-0.00643008	0.000474908
39	-0.0114165	0.000574378	-0.00617254	0.000491105	-0.0131776	0.000256401	-0.00657888	0.000478191
40	-0.0117822	0.000555926	-0.0060939	0.000423853	-0.0133058	0.000406128	-0.00675566	0.000499099
41	-0.011713	0.000522083	-0.0062054	0.000446912	-0.0138586	0.000302081	-0.00703191	0.000428988
42	-0.0119658	0.000715472	-0.00631493	0.000384634	-0.0140722	0.000456304	-0.00726914	0.000423654
43	-0.0122273	0.00085794	-0.00646093	0.000385153	-0.0142617	0.000663486	-0.00749629	0.000435324
44	-0.0125625	0.000955103	-0.00681439	0.000472626	-0.0142897	0.000881461	-0.00768927	0.000456745
45	-0.0130223	0.00109156	-0.00724534	0.000587224	-0.0145367	0.00102689	-0.00791528	0.000476238
46	-0.0131444	0.00115833	-0.00769704	0.000773896	-0.0148212	0.00102529	-0.00810154	0.000526958
47	-0.0134797	0.00124199	-0.00781644	0.00064821	-0.015402	0.00117582	-0.00830176	0.000522717
48	-0.0140084	0.00124754	-0.00907604	0.00139792	-0.0155919	0.00123092	-0.00839935	0.000503096
49	-0.0151514	0.00129887	-0.00895474	0.00110722	-0.0158767	0.00128859	-0.00855324	0.00050037
50	-0.0156661	0.00137813	-0.00860513	0.000646271	-0.0161978	0.00141008	-0.00874543	0.000480582
51	-0.015732	0.00134447	-0.00859573	0.000450781	-0.0165225	0.00146786	-0.00890985	0.00046478
52	-0.01593	0.00145227	-0.0087393	0.000322667	-0.0168739	0.00151894	-0.00908107	0.000459904
53	-0.016179	0.00149288	-0.00900265	0.000300082	-0.0171409	0.00150435	-0.00928832	0.000506286
54	-0.0168037	0.00153265	-0.00925977	0.000339766	-0.0173863	0.00150058	-0.00954701	0.000542734
55	-0.017231	0.00159495	-0.00944065	0.000305279	-0.0176473	0.00152697	-0.00974515	0.000608771
56	-0.0174703	0.00167745	-0.00957626	0.000314551	-0.0179726	0.00156145	-0.00987846	0.000615627
57	-0.0179286	0.00165379	-0.00977922	0.000330542	-0.0182601	0.00156983	-0.00998815	0.000652989
58	-0.0184839	0.00163878	-0.00998859	0.000321188	-0.0185783	0.0016007	-0.0102003	0.000686736
59	-0.0185185	0.00171052	-0.0101744	0.000311637	-0.0188725	0.00162891	-0.0103279	0.00071668
60	-0.0186597	0.00174031	-0.010399	0.000339347	-0.0191852	0.0016332	-0.0105187	0.000782146
61	-0.0189996	0.00177233	-0.0106303	0.000369478	-0.019518	0.00167438	-0.0106977	0.000814847
62	-0.0194228	0.00173912	-0.0107768	0.000437343	-0.0198238	0.00168865	-0.0107631	0.000807007
63	-0.0200168	0.00166887	-0.0110083	0.000519122	-0.0201272	0.00165773	-0.0108408	0.000776952
64	-0.0215068	0.0015916	-0.0111705	0.000577424	-0.0205639	0.00157398	-0.0109979	0.000758734
65	-0.022139	0.00169772	-0.0113677	0.000615834	-0.0209481	0.00152355	-0.0111392	0.000753277
66	-0.021572	0.0015309	-0.0116198	0.000680509	-0.0212942	0.00151002	-0.0112767	0.000778262
67	-0.022117	0.00150971	-0.01188	0.000775062	-0.021649	0.00149288	-0.0113612	0.00079856
68	-0.0223568	0.00148204	-0.0122856	0.000981653	-0.0220291	0.00147688	-0.0114665	0.000824686
69	-0.0235004	0.00158854	-0.0126831	0.00118825	-0.0224825	0.00141543	-0.0115598	0.000819256
70	-0.0232213	0.00144221	-0.0129689	0.00127376	-0.0228966	0.00137014	-0.0116731	0.000828873
71	-0.0236053	0.00141769	-0.0132691	0.00133504	-0.0234001	0.00128463	-0.0117597	0.000813192
72	-0.0240908	0.00139092	-0.0134588	0.00126918	-0.0238854	0.00119111	-0.0118646	0.000801341
73	-0.024684	0.00136904	-0.0136214	0.00112532	-0.02446	0.00112501	-0.0119843	0.000806109
74	-0.0254871	0.00142004	-0.013704	0.000918628	-0.0250635	0.00107194	-0.0121879	0.000833369
75	-0.0260375	0.00143564	-0.0138341	0.000785731	-0.0254628	0.00113324	-0.0124324	0.000864683
76	-0.0267046	0.00147727	-0.0140462	0.000718974	-0.0259412	0.00116142	-0.0126736	0.000947343
77	-0.0273092	0.00147281	-0.0143292	0.000704286	-0.0265136	0.0011251	-0.0129265	0.00104208
78	-0.0271249	0.00136339	-0.0147007	0.000668887	-0.0270006	0.00109721	-0.0131329	0.00110092
79	-0.0273285	0.00141368	-0.0149652	0.000738093	-0.0275133	0.00116171	-0.0132893	0.0011503
80	-0.0277455	0.00143421	-0.0153193	0.000840997	-0.0280229	0.00117044	-0.0133785	0.00114616
81	-0.0282199	0.00144138	-0.0156817	0.000960802	-0.0285254	0.00120617	-0.0134786	0.00115872
82	-0.0287019	0.00144635	-0.0160135	0.00103118	-0.0289724	0.00127204	-0.0135937	0.00116676
83	-0.0292585	0.00143686	-0.0164302	0.00114996	-0.0293752	0.0013034	-0.0136901	0.00114357
84	-0.0298123	0.00144322	-0.0166989	0.0011892	-0.0297951	0.00137252	-0.0137188	0.00115985
85	-0.030406	0.00142543	-0.0169334	0.00120325	-0.0302518	0.00146977	-0.0138037	0.00114575
86	-0.0308617	0.00139729	-0.0169975	0.00114954	-0.0306317	0.00150337	-0.0139587	0.00117218
87	-0.0313503	0.00138631	-0.0170761	0.0010555	-0.0310257	0.00156143	-0.0142595	0.00124636
88	-0.0320029	0.00135642	-0.0172367	0.000981878	-0.0314494	0.00158932	-0.0145373	0.00128515
89	-0.0325826	0.00137362	-0.0174763	0.000989268	-0.0318567	0.0016522	-0.0148154	0.00133744
90	-0.032944	0.00143929	-0.017727	0.00097278	-0.032273	0.00174164	-0.0150482	0.00138614
91	-0.0332978	0.00145323	-0.0178987	0.00101764	-0.0326106	0.00182071	-0.0152449	0.00140716
92	-0.0337561	0.00147879	-0.0181149	0.00104335	-0.0329817	0.0018781	-0.0153497	0.00140775
93	-0.0342477	0.00152934	-0.0183366	0.00108885	-0.0333552	0.00193087	-0.0155101	0.00141551
94	-0.0346935	0.00153182	-0.0185152	0.00112003	-0.0337181	0.0019803	-0.0155704	0.00141212
95	-0.03508	0.00157693	-0.0186682	0.00112137	-0.034108	0.00205128	-0.0156389	0.00140584
96	-0.0355029	0.0016119	-0.018898	0.00115551	-0.0344708	0.0021032	-0.0157192	0.00141957
97	-0.0360541	0.00166417	-0.0191469	0.00119085	-0.0348765	0.00218353	-0.0158438	0.00144165
98	-0.0364973	0.00171254	-0.0193818	0.00120236	-0.0353073	0.00224853	-0.0160195	0.00143314
99	-0.0370191	0.00176876	-0.0196357	0.00123396	-0.0356744	0.00233494	-0.0161726	0.00145529
100	-0.0375699	0.00189022	-0.0198427	0.0012301	-0.0360639	0.00245567	-0.016322	0.00148309
101	-0.0378439	0.00192387	-0.0200516	0.00120333	-0.0364799	0.00252756	-0.0165087	0.00152781
102	-0.0383153	0.00199414	-0.0204232	0.00125618	-0.0368657	0.00263825	-0.0166253	0.0015555
103	-0.0389846	0.00203947	-0.0209237	0.00146505	-0.0373338	0.00280834	-0.0167099	0.00157736
104	-0.0394318	0.00216956	-0.0214822	0.00156164	-0.0378514	0.00283513	-0.016772	0.0015726
105	-0.0399852	0.00223943	-0.0218503	0.00161418	-0.0381986	0.00290361	-0.0168682	0.00157431
106	-0.0406157	0.00225213	-0.0221877	0.00158596	-0.0385705	0.00298411	-0.0169293	0.00155109
107	-0.0410765	0.00229802	-0.0225381	0.00159424	-0.0389583	0.00312937	-0.0170107	0.00154998
108	-0.0414697	0.00236907	-0.0228463	0.00162888	-0.0393203	0.00321767	-0.0170701	0.00152789
109	-0.0420416	0.00244165	-0.0231454	0.00169502	-0.0397263	0.00329385	-0.0171639	0.00154383
110	-0.042533	0.00255966	-0.0233465	0.0017118	-0.0400975	0.00341415	-0.0173258	0.00157281
111	-0.0429264	0.00261101	-0.0234605	0.00168698	-0.0404911	0.00348497	-0.0175024	0.00160456
112	-0.0433824	0.00268502	-0.0239459	0.00187985	-0.0409512	0.00359564	-0.0175974	0.00157597
113	-0.0438883	0.00272897	-0.0242571	0.00195259	-0.0413029	0.00372708	-0.0177712	0.00156052
114	-0.0440209	0.00282353	-0.024258	0.00194009	-0.0417755	0.00388187	-0.0180423	0.00152625
115	-0.0444727	0.00289611	-0.0243555	0.00197371	-0.0423389	0.00398522	-0.0182068	0.00156606
116	-0.0448877	0.00295092	-0.0246949	0.00208716	-0.0428489	0.00408589	-0.0183988	0.00154293
117	-0.0454353	0.00309708	-0.0249149	0.00207676	-0.0434071	0.00425648	-0.0185788	0.00152951
118	-0.045988	0.00312477	-0.0252547	0.00214232	-0.0439719	0.00435083	-0.0187226	0.00154256
119	-0.0464445	0.00320671	-0.0255769	0.0022427	-0.0445293	0.0044644	-0.0188381	0.00156568
120	-0.0469387	0.00330732	-0.025825	0.00227412	-0.0449431	0.00462538	-0.0189956	0.0015578
121	-0.0474142	0.00336951	-0.0260783	0.00233071	-0.0453614	0.00475386	-0.019184	0.0015448
122	-0.0480259	0.00346859	-0.0264528	0.00236822	-0.0458573	0.00489091	-0.0192639	0.00157655
123	-0.048559	0.00355152	-0.0267364	0.00240582	-0.0462814	0.00498129	-0.0194153	0.00158714
124	-0.0492276	0.00360836	-0.0271081	0.00242598	-0.0466559	0.0050942	-0.0196049	0.00157502
125	-0.0498035	0.0036954	-0.0273512	0.00230715	-0.0472023	0.00515129	-0.0197014	0.00157647
126	-0.0503091	0.00377039	-0.0275561	0.00209453	-0.0476581	0.00520654	-0.0198974	0.0015734
127	-0.0507214	0.00390196	-0.0286663	0.00268238	-0.0482205	0.00527836	-0.020105	0.00158819
128	-0.051207	0.00397689	-0.0292395	0.00275314	-0.0487424	0.00536974	-0.0201628	0.00165948
129	-0.0517358	0.00403705	-0.0300801	0.00320236	-0.049255	0.00547245	-0.0202778	0.00168193
130	-0.0523094	0.00407497	-0.0297883	0.00256671	-0.0497159	0.00566131	-0.0204334	0.00168685
131	-0.0529792	0.00411615	-0.0303525	0.00261132	-0.0502036	0.00578336	-0.020597	0.00172601
132	-0.0535817	0.00417514	-0.0315635	0.00335859	-0.0507728	0.00592734	-0.0207073	0.00177731
133	-0.0543054	0.00418588	-0.0319356	0.00343511	-0.0513499	0.00611084	-0.0209406	0.00180886
134	-0.0550917	0.00424485	-0.0313099	0.00269557	-0.0518757	0.00625364	-0.0210889	0.00180132
135	-0.0554302	0.00437904	-0.0312051	0.00241878	-0.05223	0.00637935	-0.0212707	0.00179616
136	-0.0558534	0.0045378	-0.0312114	0.00224724	-0.0527632	0.00654713	-0.0214027	0.00182889
137	-0.0563841	0.00459042	-0.0314804	0.002281	-0.0532887	0.00663723	-0.0215659	0.00182657
138	-0.056928	0.00461583	-0.0318411	0.00234099	-0.0537688	0.00669766	-0.0216977	0.00185559
139	-0.0573115	0.00472317	-0.0322003	0.0024423	-0.0543053	0.006695	-0.0217932	0.00189659
140	-0.0578281	0.00477137	-0.0323653	0.00252307	-0.0546999	0.0067819	-0.0219156	0.00191363
141	-0.0586877	0.00479419	-0.0324791	0.00244342	-0.0551722	0.00689209	-0.0220824	0.00193349
142	-0.0595111	0.0047774	-0.0327004	0.00240836	-0.0555959	0.00697208	-0.0222641	0.00197779
143	-0.0596577	0.00499552	-0.0336128	0.00295517	-0.0564013	0.00691891	-0.0224012	0.00202731
144	-0.0603221	0.00509348	-0.0335755	0.00279203	-0.0568338	0.00708328	-0.0225859	0.00205152
145	-0.0609428	0.00518472	-0.033748	0.00275356	-0.0573951	0.00723783	-0.0227263	0.00206195
146	-0.0617203	0.00525265	-0.0340607	0.00275044	-0.0579974	0.00731954	-0.0228759	0.00208608
147	-0.062411	0.00524445	-0.0343821	0.00276996	-0.0586556	0.00747195	-0.0229861	0.00204212
148	-0.0629985	0.00539971	-0.0348138	0.00277881	-0.0591268	0.00771535	-0.0231065	0.00203204
149	-0.0635025	0.00545674	-0.0353899	0.00288567	-0.0596584	0.00780746	-0.0232627	0.00207149
150	-0.0641421	0.0054119	-0.0359328	0.00293025	-0.060128	0.00786474	-0.0233618	0.00203461
151	-0.0646682	0.00551297	-0.0363105	0.00284809	-0.0607132	0.00797606	-0.0233612	0.00185161
152	-0.0652951	0.00547785	-0.0369755	0.00278553	-0.0612427	0.00810017	-0.0233099	0.00173201
153	-0.0659109	0.00545179	-0.0374758	0.0028717	-0.0618313	0.00812495	-0.0234067	0.00174605
154	-0.0665365	0.00541763	-0.037993	0.00288438	-0.0623588	0.00819248	-0.0236389	0.00178944
155	-0.0673054	0.00539077	-0.0384841	0.00288293	-0.0630114	0.00820388	-0.0238195	0.001845
156	-0.067931	0.00542687	-0.0390043	0.0029437	-0.0637332	0.00821414	-0.0239998	0.00189016
157	-0.0687074	0.00539624	-0.0396616	0.00309958	-0.0643806	0.00837869	-0.0241986	0.00191158
158	-0.0693709	0.00543344	-0.0398397	0.00284872	-0.0647153	0.00845964	-0.0243531	0.00194703
159	-0.0695309	0.00568105	-0.0389833	0.00196206	-0.0641004	0.00890653	-0.0238355	0.00156738
160	-0.0706325	0.00563882	-0.0394163	0.00205683	-0.064941	0.00892046	-0.024477	0.00182863
161	-0.0711118	0.00565578	-0.0400053	0.0023192	-0.0655508	0.00888587	-0.0248691	0.00202327
162	-0.0718208	0.00557873	-0.0406319	0.00266118	-0.0662463	0.00881225	-0.0251921	0.00213898
163	-0.0723668	0.00557564	-0.0412866	0.00295447	-0.0670371	0.00869612	-0.0254432	0.00222011
164	-0.0729276	0.00556618	-0.041922	0.00323852	-0.0677379	0.00862552	-0.0256382	0.00227852
165	-0.0736674	0.00548203	-0.0425525	0.00347361	-0.0683429	0.008598	-0.0258865	0.00235431
166	-0.074129	0.00549687	-0.0431772	0.00370949	-0.0690231	0.00853677	-0.0261505	0.00243497
167	-0.0746739	0.00548426	-0.0435683	0.00389571	-0.0697796	0.00844383	-0.0263494	0.0024981
168	-0.0751659	0.00549345	-0.0441683	0.00391558	-0.0705691	0.00833952	-0.0265923	0.00252169

## Sheet: 5.POC δ13CPOC
Figrue 6: Evolution of POC concentrations and δ13CPOC values during the incubations
	(a) POC concentrations (mg L-1) for arable land soil
	Time (h)	SOC+AMO_rotation	SD_1	SOC+AMO_stationary	SD_2	SOC-AMO_rotation	SD_3	SOC-AMO_stationary	SD_4
	0	12.21		12.21		12.21		12.21
	24	11.87	0.21	11.94	0.17	12	0.13	11.93	0.19
	48	11.85	0.21	11.6	0.11	11.56	0.47	11.54	0.04
	96	10.85	0.31	11.16	0.16	11.73	0.12	11.46	0.08
	168	10.62	0.22	11.16	0.14	11.52	0.15	11.44	0.13
	(b) δ13CPOC values(‰) for arable land soil
	Time	SOC+AMO_rotation	SD_1	SOC+AMO_stationary	SD_2	SOC-AMO_rotation	SD_3	SOC-AMO_stationary	SD_4
	0	-29.41		-29.41		-29.41		-29.41
	24	-29.18	0.1	-29.36	0.12	-29.34	0.09	-29.31	0.13
	48	-29.12	0.18	-29.06	0.23	-29.25	0.08	-29.22	0.1
	96	-29.21	0.1	-29.19	0.1	-29.22	0.09	-29.21	0.09
	168	-29.33	0.09	-29.32	0.12	-29.36	0.07	-29.26	0.12
	(c) POC concentrations (mg L-1) for forest soil
	Time	SOC+AMO_rotation	SD_1	SOC+AMO_stationary	SD_2	SOC-AMO_rotation	SD_3	SOC-AMO_stationary	SD_4
	0	9.9		9.9		9.9		9.9
	24	9.18	0.28	9.67	0.38	9.11	0.41	9.69	0.24
	48	9.2	0.33	9.02	0.45	9.24	0.49	9.66	0.27
	96	9.32	0.32	9.15	0.31	9.7	0.34	8.36	0.43
	168	8.83	0.34	9.2	0.21	9.81	0.12	9.4	0.23
	(d) δ13CPOC values(‰) for forest soil
	Time	SOC+AMO_rotation	SD_1	SOC+AMO_stationary	SD_2	SOC-AMO_rotation	SD_3	SOC-AMO_stationary	SD_4
	0	-28.6		-28.6		-28.6		-28.6
	24	-28.2	0.1	-28.15	0.07	-28.03	0.08	-28.04	0.09
	48	-28.12	0.09	-28.44	0.19	-28.19	0.07	-27.99	0.1
	96	-28	0.07	-28.19	0.1	-28.28	0.16	-28.1	0.09
	168	-28.25	0.11	-28.08	0.09	-28.25	0.2	-28.03	0.06

## Sheet: 6.DOC δ13CDOC
Figrue 7: Evolution of DOC concentrations (mg L-1) and δ13CDOC values(‰) during the incubations
	(a) DOC concentrations (mg L-1) for arable land soil
	Time (h)	SOC+AMO_rotation	SD_1	SOC+AMO_stationary	SD_2	DOC control_rotation	SD_3	DOC control_stationary	SD_4	SOC-AMO_rotation	SD_3	SOC-AMO_stationary	SD_4
	0	3.48	0.2	3.48	0.2	3.48	0.2	3.48	0.2	3.28	0.38	3.28	0.38
	24	3.61	0.15	3.55	0.17	3.07	0.22	3.01	0.28	3.09	0.47	3.11	0.4
	48	3.43	0.17	3.61	0.16	2.94	0.28	2.86	0.33	3.26	0.34	3.14	0.37
	96	3.47	0.13	3.12	0.26	3.04	0.18	2.9	0.24	3.38	0.2	3.37	0.13
	168	3.34	0.12	3.17	0.25	3.04	0.16	2.73	0.32	3.29	0.22	3.3	0.09
	(b) δ13CDOC values(‰) for arable land soil
	Time (h)	SOC+AMO_rotation	SD_1	SOC+AMO_stationary	SD_2	DOC control_rotation	SD_3	DOC control_stationary	SD_4	SOC-AMO_rotation	SD_3	SOC-AMO_stationary	SD_4
	0	-28.63	0.65	-28.63	0.65	-28.63	0.65	-28.63	0.65	-29.83	0.54	-29.83	0.54
	24	-29.09	0.59	-29.25	0.41	-29.42	0.59	-29.81	0.6	-30.63	0.97	-29.8	0.5
	48	-29.43	0.46	-29.49	0.44	-29.51	0.62	-29.91	0.65	-30.11	0.33	-30.14	0.55
	96	-29.21	0.55	-29.96	0.61	-29.63	0.51	-29.89	0.52	-29.87	0.36	-29.74	0.22
	168	-29.3	0.46	-29.8	0.73	-29.28	0.44	-30.16	0.65	-30.18	0.43	-29.82	0.26
	(c) DOC concentrations (mg L-1) for forest soil
	Time (h)	SOC+AMO_rotation	SD_1	SOC+AMO_stationary	SD_2	DOC control_rotation	SD_3	DOC control_stationary	SD_4	SOC-AMO_rotation	SD_3	SOC-AMO_stationary	SD_4
	0	3.62	0.28	3.62	0.28	3.62	0.28	3.62	0.28	3.62	0.28	3.62	0.28
	24	3.88	0.1	3.89	0.21	3.57	0.2	3.52	0.2	4	0.21	4	0.22
	48	3.93	0.12	3.58	0.19	3.35	0.36	3.75	0.36	3.93	0.1	3.79	0.11
	96	3.91	0.09	3.88	0.13	3.44	0.11	3.39	0.11	3.97	0.07	3.87	0.1
	168	3.95	0.06	3.74	0.03	3.23	0.06	3.26	0.06	3.96	0.05	3.92	0.11
	(d) δ13CDOC values(‰) for forest soil
	Time (h)	SOC+AMO_rotation	SD_1	SOC+AMO_stationary	SD_2	DOC control_rotation	SD_3	DOC control_stationary	SD_4	SOC-AMO_rotation	SD_3	SOC-AMO_stationary	SD_4
	0	-29.19	0.06	-29.19	0.06	-29.19	0.06	-29.19	0.06	-29.19	0.06	-29.19	0.06
	24	-29.18	0.09	-29.76	0.12	-29.05	0.1	-29.07	0.11	-29.54	0.15	-29.77	0.22
	48	-29.14	0.08	-29.11	0.08	-29.09	0.1	-29.11	0.09	-29.08	0.14	-29.12	0.11
	96	-29.05	0.12	-29.08	0.11	-29.67	0.5	-29.27	0.15	-29.03	0.13	-29	0.11
	168	-29.27	0.16	-29.09	0.13	-29.09	0.11	-29.09	0.13	-29.07	0.12	-29.09	0.17
