# Supplementary material for: Rapid soil organic carbon decomposition in river systems: effects of the aquatic microbial community and hydrodynamical disturbance
Source: Copernicus journal article supplement (doi:10.5194/bg-18-1511-2021), 2021-03-03
Supplement: Supplementary file 2 [file bg-18-1511-2021-supplement.zip]

Archive with 2 entries (2 files):
- Zhao et al_Supplementary materials.xlsx
- bg-18-1511-2021-supplement-title-page.pdf
